1 **Functional analysis of *Salix purpurea* genes support roles for *ARR17* and *GATA15* as master regulators**  
2 **of sex determination**

3 Authors: Brennan Hyden<sup>1,2</sup>, Dana L. Carper<sup>2</sup>, Paul E. Abraham<sup>2</sup>, Guoliang Yuan<sup>2</sup>, Tao Yao<sup>2</sup>, Leo Baumgart<sup>3</sup>,  
4 Yu Zhang<sup>3</sup>, Cindy Chen<sup>3</sup>, Ronan O'Malley<sup>3</sup>, Jin-Gui Chen<sup>2</sup>, Xiaohan Yang<sup>2</sup>, Robert L. Hettich<sup>2</sup>, Gerald A.  
5 Tuskan<sup>2</sup>, Lawrence B. Smart<sup>1\*</sup>

6 \*Corresponding author email: [lbs33@cornell.edu](mailto:lbs33@cornell.edu), mailing address: Cornell University, 630 West North  
7 Street, Geneva, NY 14456

- 8 1. Horticulture Section, School of Integrative Plant Science, Cornell University, Cornell AgriTech,  
9 Geneva, NY 14456  
10 2. Biosciences Division, Oak Ridge National Laboratory, Oak Ridge, TN 37831  
11 3. US Department of Energy Joint Genome Institute, Lawrence Berkeley National Laboratory,  
12 Berkeley, CA 94720

13 Notice: This manuscript has been authored by UT-Battelle, LLC under Contract No. DE-AC05-00OR22725  
14 with the U.S. Department of Energy. The United States Government retains and the publisher, by  
15 accepting the article for publication, acknowledges that the United States Government retains a non-  
16 exclusive, paid-up, irrevocable, worldwide license to publish or reproduce the published form of this  
17 manuscript, or allow others to do so, for United States Government purposes. The Department of  
18 Energy will provide public access to these results of federally sponsored research in accordance with the  
19 DOE Public Access Plan (<http://energy.gov/downloads/doe-public-access-plan>).

20 **Running head:** Functional analysis of willow sex determination genes

21 **Abstract**

22 The Salicaceae family is of growing interest in the study of dioecy in plants because the sex  
23 determination region (SDR) has been shown to be highly dynamic, with differing locations and  
24 heterogametic systems between species. Without the ability to transform and regenerate *Salix* in tissue  
25 culture, previous studies investigating the mechanisms regulating sex in the genus *Salix* have been  
26 limited to genome resequencing and differential gene expression, which are mostly descriptive in  
27 nature, and functional validation of candidate sex determination genes has not yet been conducted.  
28 Here we used *Arabidopsis* to functionally characterize a suite of previously identified candidate genes  
29 involved in sex determination and sex dimorphism in the bioenergy shrub willow *Salix purpurea*. Six  
30 candidate master regulator genes for sex determination were heterologously expressed in *Arabidopsis*,  
31 followed by floral proteome analysis. In addition, 11 transcription factors with predicted roles in  
32 mediating sex dimorphism downstream of the SDR were tested using DAP-Seq in both male and female  
33 *S. purpurea* DNA. The results of this study provide further evidence to support models for the roles of  
34 *ARR17* and *GATA15* as master regulator genes of sex determination in *S. purpurea*, contributing to a  
35 regulatory system that is notably different from that of its sister genus *Populus*. Evidence was also  
36 obtained for the roles of two transcription factors, an *AP2/ERF* family gene and a homeodomain-like  
37 transcription factor, in downstream regulation of sex dimorphism.

38 **Keywords:** *Arabidopsis*, dioecy, proteomics, *Salix*, sex determination, transgenics, willow

39

## 40 Introduction

41 Understanding the genetic regulation of sex determination in dioecious plants is of interest in the plant  
42 biology community because, while dioecy is only observed in about six percent of angiosperm species, it  
43 is present in numerous taxa and families and is thought to have evolved independently on as many as  
44 5,000 occasions (Käfer et al., 2017). As such, understanding the genetic mechanisms that lead to  
45 separation of sexes in different taxa can provide insight into the repeated evolution and maintenance of  
46 dioecy. The Salicaceae family is of particular interest in this effort, as nearly all species in the family are  
47 dioecious, and it contains two genera of economic importance: poplars (*Populus*) and willows (*Salix*). In  
48 particular, *Salix* contains over 300 species, which are native to every continent except Antarctica and  
49 Australia, and grow in a diverse range of biomes, including subarctic tundra, deserts and temperate and  
50 tropical forests (Argus, 1997; Kuzovkina et al., 2007). *Salix* species also exhibit a variety of growth habits,  
51 ranging from prostrate dwarfs to shrubs and trees (Argus, 1997). Despite this remarkable diversity in  
52 species range and form, dioecy has been maintained throughout the evolution of most of the family,  
53 including all *Populus* and *Salix*. Moreover, the sex determination region (SDR) in *Salix* appears to have  
54 shifted among chromosomes and varied heterogametic systems on multiple occasions, with tree willows  
55 such as *S. nigra* and *S. chaenomeloides* containing SDR on Chr07 with an XY system (Sanderson et al.,  
56 2021; Wang et al., 2022) and alternatively on Chr15 with an XY system in *S. arbutifolia* (Wang et al.,  
57 2022). Shrub willows, including *S. purpurea* and *S. viminalis*, contain the SDR on Chr15 under a ZW  
58 system (Pucholt et al., 2015; Zhou et al., 2018; Wilkerson et al., 2022). Because of the dynamic nature of  
59 sex determination in Salicaceae, there is an opportunity to characterize the precise mechanisms of sex  
60 determination in diverse species across this family and to add to our understanding of the evolution,  
61 conservation, and transition of the SDR.

62 Much work has already been done to identify candidate master regulator genes in both *Populus* and  
63 *Salix*. Müller et al (2020) demonstrated that a homolog of *ARR17*, an Arabidopsis type-C response  
64 regulator, is likely the sole master regulator gene in *Populus*, with females expressing *ARR17* while in  
65 males it is either absent or silenced by smRNA produced from exon 1 repeats located on the Y  
66 chromosome (Müller et al., 2020). A similar *ARR17* mediated sex determination system is thought to be  
67 present in some willows with Chr07 and Chr15 XY systems, but has not been confirmed through  
68 expression or functional analysis (Wang et al., 2022). *ARR17* was first proposed as a candidate master  
69 regulator gene of sex determination in *S. purpurea* (Chr15 ZW SDR) by Zhou et al. (2020), where the  
70 authors identified four inverted repeats of the gene on Chr15W in a female *S. purpurea* (Zhou et al.,

71 2020). Another study conducted RNA-Seq and smRNA-Seq of an F<sub>2</sub> family of *S. purpurea* and proposed  
72 several candidate master regulator genes in addition to *ARR17*, but notably did not find evidence for the  
73 smRNA silencing mechanism in males that exists in XY *Populus* (Hyden et al., 2021). This lack of smRNA  
74 expression, along with confirmed expression of *ARR17* in both male and female *S. purpurea*, suggests  
75 that if *ARR17* is a master regulator gene in *S. purpurea*, it may operate via a mechanism that differs from  
76 *Populus* and the tree willows (Hyden et al., 2021). Based on sequencing and expression analysis, several  
77 other genes have been proposed as candidate genes for sex determination in addition to *ARR17*,  
78 including homologs of *GATA15*, *AGO4*, *DRB1*, and several hypothetical proteins (Hyden et al., 2021).  
79 However, no functional validation has been conducted to confirm the role of these proposed sex-  
80 determination genes. Recently, sequencing and expression data from a monoecious *S. purpurea*  
81 revealed a structural variant on Chr15W that includes deletions of *ARR17*, *AGO4*, and *DRB1*, but not  
82 *GATA15* (Hyden et al., 2023). Based on these data, we hypothesize that *GATA15* is a master regulator  
83 gene of sex determination that functions to promote female development, while *ARR17* acts as a  
84 suppressor of male development.

85 Previous research on willow sex determination and dimorphism has relied primarily on the comparison  
86 of DNA and RNA sequencing data between males and females (Carlson et al., 2017; Zhou et al., 2020;  
87 Hyden et al., 2021); however, functional validation is ultimately needed to support these hypotheses.  
88 Yet, unlike poplar, there is not a facile protocol for *Salix* transformation and regeneration from tissue  
89 culture, so it is not feasible to study gene function in willow using transformation-based gain/loss-of  
90 function approaches. Our best alternative is to use a model plant species, such as *Arabidopsis*, for  
91 transgenic manipulation. In addition, transcription factors can also be studied *in vitro* using DAP-Seq as it  
92 does not require plant transformation. In DAP-Seq, transcription factors are transiently expressed and  
93 incubated with native genomic DNA. Transcription factor bound DNA fragments are then sequenced and  
94 aligned to the reference genome (O'Malley et al., 2016). This system enables transcription factor binding  
95 analysis in any species from which candidate genes can be cloned and high-quality DNA can be  
96 sequenced.

97 In this study, we sought to elucidate the mechanisms of sex determination and dimorphism in *S.*  
98 *purpurea* by investigating both master regulator genes of sex and transcription factors with predicted  
99 roles in sex dimorphism. Six candidate master regulator genes for sex determination in *S. purpurea* were  
100 heterologously expressed in *Arabidopsis* using a constitutive promoter. Bottom-up proteomics was  
101 performed on floral tissue of the transgenic *Arabidopsis* plants to identify proteins regulated by the

102 overexpressed candidate master regulators of primary sex dimorphism (anther or stamen  
103 development). To characterize regulation of sex dimorphism downstream of the SDR, which includes  
104 floral development and floral secondary metabolite production, DAP-Seq was performed on 11  
105 transcription factors. Nine of the TFs tested are located on autosomes and have eQTL in the *S. purpurea*  
106 SDR and two are located in the SDR and are candidate master regulator genes of sex, for which  
107 expression in Arabidopsis and proteomic analysis was also performed (Hyden et al., 2021). Using data  
108 from these combined methods, we constructed a conceptual model for the functional role of several  
109 genes involved in sex determination and dimorphism and provide evidence to support of *ARR17* and  
110 *GATA15* as master regulator genes of sex determination in *S. purpurea*.

## 111 **Results**

### 112 *Proteomic Analysis*

113 Transgenic Arabidopsis floral proteomics data were used to assess the broad impact of each candidate *S.*  
114 *purpurea* gene on the proteome as well as changes among proteins relevant to floral development and  
115 sex determination biological processes. Eight transgenic constructs were generated (six candidate  
116 master regulator gene and two methodological control genes), each with 4-6 independent insertion  
117 events (Table 1) and proteome data were obtained from three full-sibling T<sub>2</sub> plants from each event in  
118 addition to five empty vector control plants, for a total of 122 plants evaluated. Across all 122 samples, a  
119 total of 17,191 Arabidopsis protein accessions were identified and the total proteins identified for each  
120 transgenic line ranged from 11,395 to 16,885 (Table 1). The relative impact of each heterologous  
121 expression transgenic line on proteome expression was compared against the empty vector control  
122 proteome data. Across the eight expression lines, the number of proteins of differential abundance  
123 (PDA) ranged from 103 to 5,970 (Supplemental Dataset S20). Enriched MapMan functional categories  
124 (Schwacke et al., 2019) were identified for all eight heterologously expressed genes to identify biological  
125 processes affected by expression of each candidate master regulator (Fig. S1-S2). As expected, the  
126 impact of each expressed gene on the floral proteome was not uniform, as shown by the variation in  
127 total peptides detected, PDAs, and MapMan enrichment categories. Plants expressing *GATA15* showed  
128 the greatest number of PDAs when compared against the empty vector control (Fig. 1, Table 1),  
129 followed by hypothetical protein Sapur.15WG074900 and *ARR17* with 5,318 and 4,305 PDAs  
130 respectively (Fig. 1, Fig. S3, Table 1). The positive control genes *LEAFY* and *FT* affected only 444 and 179  
131 PDAs, respectively (Fig. S3, Table 1). The CCHC Zinc finger Sapur.15WG068800 produced the fewest  
132 number of PDAs, at only 103.

133 In general, most transgenic proteomes contained a substantial number of downregulated proteins when  
134 compared to the empty vector control and this observation was particularly pronounced when  
135 expressing *ARR17*, *GATA15*, and Sapur.15WG074900 (Fig. 2). Resulting PDAs across each heterologous  
136 expression line were compared to assess similarity in the resulting proteome changes. Among all the  
137 PDAs, there was considerable proteome changes observed between *ARR17*, *GATA15*, and  
138 Sapur.15WG074900 hypothetical protein lines (Fig. 2). Notably, in addition to the large number of  
139 resulting PDAs, *GATA15* and *ARR17* expression lines exhibited unique protein abundance profiles of  
140 multiple floral development genes, indicating a likely role in floral and reproductive development and  
141 sex determination.

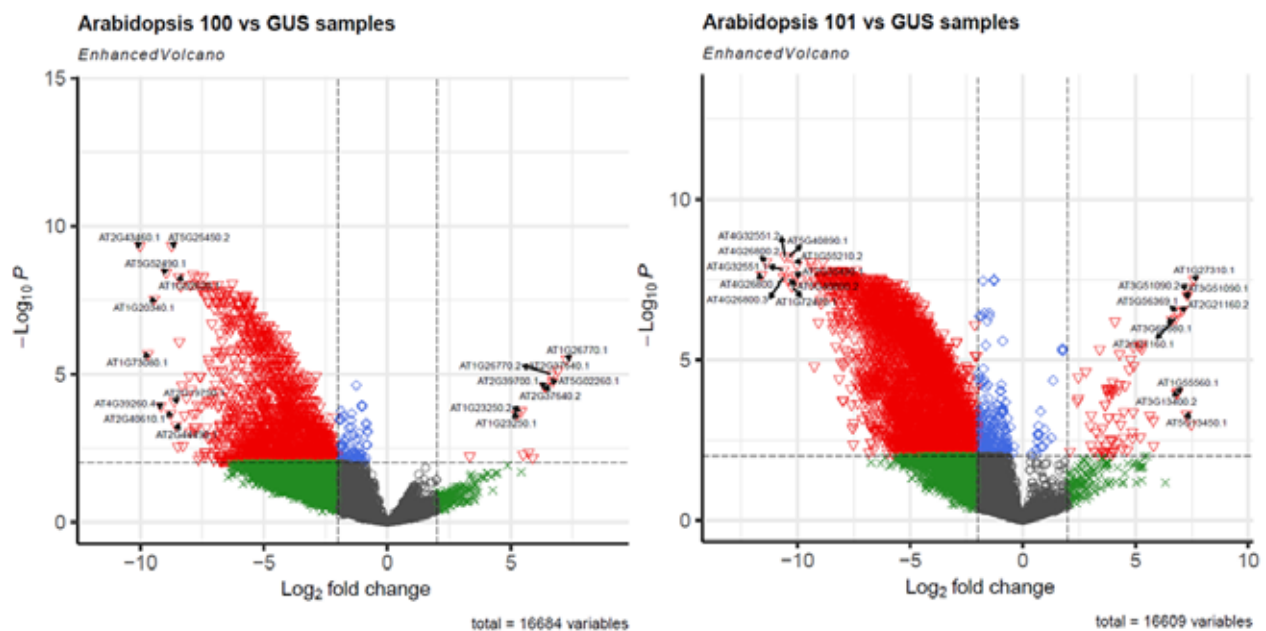

143 **Figure 1.** Volcano plots displaying the total proteins of differential abundance (PDA) results for the  
144 *ARR17* (100, left) and *GATA15* (101, right) expression lines, relative to the empty vector control. Grey  
145 indicates non-significant proteins, green indicates those that meet the log2 FC cutoff but not p-value,  
146 blue indicates those that meet the p-value threshold but not log2 FC, and red indicates proteins that  
147 have met the log2 FC cutoff and p-value threshold. Identities of the most extreme PDA are indicated.

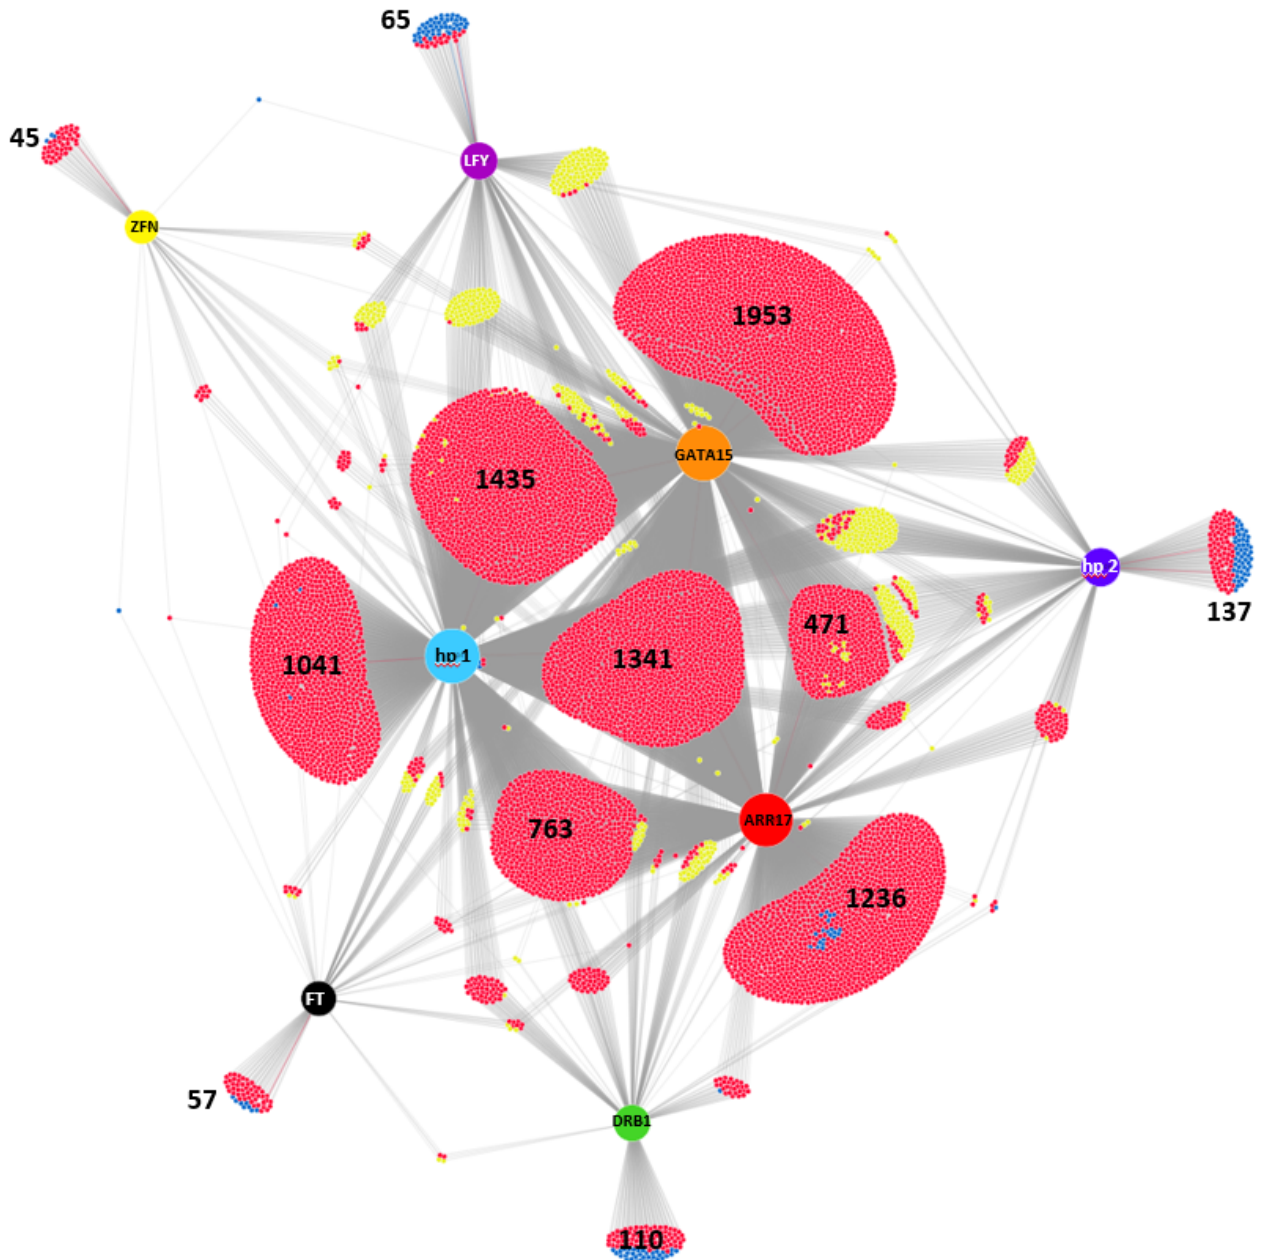

148

149 **Figure 2.** DiVenn diagram comparing proteomic expression patterns in transgenic plants heterologously  
150 expressing each of the eight *S. purpurea* genes relative to the empty vector control. Colored nodes  
151 represent expressed genes (ZFN: Sapur.15WG068800; hp 1: Sapur.15WG074900; hp 2:  
152 Sapur.15WG075700). Proteins are grouped according to unique differential abundance or shared  
153 differential abundance among the Arabidopsis lines. Relative to the empty vector control, red points  
154 represent downregulated PDAs, blue points are upregulated PDAs, and yellow points are PDAs which  
155 show differing abundance patterns between expression lines. Groupings containing unique PDAs and  
156 the largest groupings of shared PDA are labeled with the respective number of proteins in each group.

157

158 *Sapur.15WG072500 ARR17 expression results*

159 The *ARR17*-OX lines (pBH100) showed 4,305 PDAs, 1,236 of which had unique abundance patterns when  
160 compared to other heterologously expressed candidate genes (Table 1, Fig. 1-2). Enriched MapMan  
161 categories included chromatin organization, coenzyme metabolism, transferase and hydrolase enzyme  
162 activity, multi-process regulation, protein homeostasis and modification, RNA biosynthesis and  
163 processing, and vesicle trafficking (Fig. S1). Among the proteins showing differential abundance unique  
164 to the *ARR17*-OX lines were several with annotations related to floral development, including a homolog  
165 of *PISTILLATA* and seven genes involved in tapetum and pollen development (Table 2). Among the  
166 proteins most regulated in the *ARR17*-OX lines were multiple expansin family proteins, which have been  
167 shown to be involved in pollen tube development and cell expansion (Table S1, Fig. 1) (Liu et al., 2021).

168 *Sapur.15WG062800 GATA15 expression results*

169 The *GATA15*-OX lines (pBH101) showed the greatest number of floral PDAs by a substantial margin at  
170 5,970, of which 1,953 had unique abundance patterns (Table 1, Fig. 1-2), as well as the greatest number  
171 of enriched MapMan functional categories, at 22. Among the enriched MapMan categories were cell  
172 cycle organization, transcriptional regulation, RNA modification, and vesicle transport (Fig. S1). *GATA15*  
173 was one of two genes tested, the other being *ARR17*, whose expression resulted in a unique differential  
174 abundance pattern of proteins with floral development annotations, including the upregulation of  
175 *FLOR1*, a gene involved in floral meristem development and transition (Acevedo et al., 2004), and  
176 downregulation of two isoforms each of *SHATTERPROOF1* homologs and *AGL72* homologs, involved in  
177 fruit dehiscence and floral transition, respectively (Liljegren et al., 2000; Dorca-Fornell et al., 2011)  
178 (Table 2). Among the proteins with the greatest abundance in the *GATA15*-OX lines were *SKU5*-Similar  
179 13 and *SKU5*-Similar 14, the former of which has been shown to be essential for pollen tube growth  
180 through regulation of jasmonic acid biosynthesis (Zhang et al., 2022). However, these proteins do not  
181 appear to be uniquely upregulated by *GATA15*, as they were also upregulated in the hypothetical  
182 protein Sapur.15WG074900 transgenic lines. Among the most downregulated proteins in *GATA15*-OX  
183 lines were two isoforms of *LEUNIG*, which is involved in regulating gynoecium development (Table 2,  
184 Table S1, Fig. 1).

185

186

187



188 *Sapur.15WG068800 CCHC Zinc Finger Transcription Factor expression results*

189 The *Sapur.15WG068800-OX* lines (pBH102) had the fewest PDAs relative to the control at only 103, of  
190 which 45 had unique protein abundance patterns (Table 1, Fig. S3). Enriched functions included  
191 phosphorylation, carrier-mediated transport, and solute channel transport (Fig. S2).

192 *Sapur.15WG074300 DRB1 expression results*

193 The lines expressing *DRB1* (pBH103) had 343 PDAs relative to the empty vector control, of which 110  
194 showed unique abundance patterns (Table 1, Fig. 2, Fig. S3). Enriched functional categories included  
195 sucrose metabolism, chromatin structure, hydrolase enzyme activity, and MAP kinase cascade signaling  
196 (Fig. S2).

197 *Sapur.15WG74900 hypothetical protein expression results*

198 In addition to *ARR17* and *GATA15*, plants expressing the hypothetical protein *Sapur.15WG074900*  
199 (pBH104) also showed an exceptionally high number of PDAs at 5,318, of which 1,041 had unique  
200 abundance patterns (Table 1, Fig. 2, Fig. S3). Despite this large number of floral PDAs, there were not  
201 any protein annotations among these that have been previously related to floral development (two  
202 *SKU5*-like proteins were upregulated, but their upregulation was also observed in the *GATA15-OX* lines).  
203 *Sapur.15WG074900* lines also showed the second greatest number of enriched functional categories,  
204 with 20 that were significant (Fig. S2), including vesicle trafficking, RNA splicing, homeostasis, and  
205 modification, phosphorylation, ubiquitin-proteasome system, calcium-dependent signaling, fatty acid  
206 metabolism, and sucrose metabolism.

207 *Sapur.15WG075700 hypothetical protein expression results*

208 Plants expressing the hypothetical protein *Sapur.15WG075700* (pBH106) had 611 PDAs, of which 137  
209 were unique (Table 1, Fig. S3). Microfilament network, fatty acid metabolism, protein quality control,  
210 phosphorylation, transcriptional regulation, RNA export, and primary active transport of solutes were all  
211 enriched functions in these plants (Fig. S2).

212 *Sapur.15WG122200 LEAFY control expression results*

213 A *S. purpurea* homolog of *LEAFY*, located on Chr15, was expressed as a positive experimental control  
214 (pBH107). The *LEAFY-OX* lines had 444 PDAs, of which only 65 were unique (Table 1, Fig. S3). Among the

215 significantly enriched functional terms were pectin, microtubular network, MAP kinase cascade  
216 signaling, and transcriptional regulation (Fig. S2).

#### 217 *Sapur.008G061900 Flowering Locus T control expression results*

218 *A. S. purpurea Flowering Locus T (FT)* homolog was also included as a positive experimental control  
219 (pBH108), and showed 179 PDAs, of which 57 had a unique abundance pattern (Table 1, Fig. S3). The *FT*-  
220 OX lines showed enrichment for the fewest functional categories, with only two that were significant:  
221 oxidoreductase enzymes and transcriptional regulation (Fig. S2). Arabidopsis T<sub>2</sub> progeny from all five *S.*  
222 *purpurea Flowering Locus T (FT)* expression events showed early flowering phenotypes when compared  
223 to the empty vector control, producing inflorescences in just 23 days after germination (Fig. S4). These  
224 observations are consistent with the Arabidopsis *FT* overexpression phenotype (Kardailsky et al., 1999)  
225 and indicated the *S. purpurea FT* homolog was both expressed and functional in Arabidopsis, which is  
226 the first such example of functional expression of an *S. purpurea* gene in Arabidopsis. Among the most  
227 upregulated proteins in the *FT*-OX lines were three isoforms of *FASCIATA5*, which is involved in floral  
228 initiation and is consistent with the role of *FT* in inducing early flowering (Fig. 1, Table S1) (Albert et al.,  
229 2015).

#### 230 *Genome-wide identification of transcription factor binding sites*

231 In DAP-Seq, peak calling is performed by mapping transcription factor bound DNA fragments to the  
232 reference genome and comparing the relative read abundance to background levels of mapping, with a  
233 three-fold mapping rate relative to background being a standard minimum cutoff for identifying putative  
234 transcription factor binding sites, also termed “summits”. Candidate target genes are identified as those  
235 nearest to a summit with expression in the direction away from the summit (i.e. antisense if upstream of  
236 the summit, positive sense if downstream of the summit). Of the 11 transcription factors tested by DAP-  
237 Seq, three (*Sapur.001G003600.1 (AP2/ERF, GCCGGC binding sequence)*, *Sapur.003G027300.1*  
238 (*Homeodomain-like, TGGATAA binding sequence*), and *Sapur.15WG062800.1 (GATA15, GATCA binding*  
239 *sequence)*) produced large numbers of significant peaks with a threshold of three-fold or greater  
240 mapping in the 94006 female and ‘Fish Creek’ male libraries along with similar binding motif predictions  
241 in both libraries (Table 3, Fig. S5). In particular, *Sapur.001G003600.1* had 12 peaks in 94006 and five  
242 peaks in ‘Fish Creek’ with a mapping rate at least 10-fold over background, while *Sapur.003G027300.1*  
243 had 36 in 94006 and 56 in ‘Fish Creek’. The remaining eight transcription factors that were tested  
244 produced inconsistent motif predictions between the two libraries and fewer than 20 significant peaks

245 in any library (Table 3, Fig. S5, Supplemental Dataset S21). Many of the peaks were shared among these  
246 eight transcription factors, suggesting that the results from these latter eight genes are likely the result  
247 of background mapping and not true transcription factor binding sites. All three genes that produced  
248 prominent binding motifs and more than 20 significant binding sites also targeted multiple floral  
249 development genes (Table S2), confirming a likely role in the regulation of primary sex dimorphism and  
250 development.

## 251 **Discussion**

### 252 *Transgenic Arabidopsis and proteomic analysis*

253 In this study we were able to measure and identify over 17,000 total proteins, including 11,000 protein  
254 models for each overexpressed gene and a multitude of PDAs (Table 1, Fig. S1-S3). These protein  
255 numbers exceed that of recent studies on Arabidopsis floral tissue, which identified between 8,000 and  
256 12,000 proteins (Jing et al., 2020; Lu et al., 2020). This is the first study reporting on *S. purpurea* gene  
257 heterologous expression in Arabidopsis, confirming the validity of this system for functional genomics  
258 studies in *Salix*, which is especially useful since stable transformants in *S. purpurea* cannot be generated.

259 Three of the candidate genes used in this study have vague annotations and have not been previously  
260 well characterized: Sapur.15WG068800 (pBH102, CCHC Zinc Finger nuclease), Sapur.15WG074900  
261 (pBH104, hypothetical protein), and Sapur.15WG075700 (pBH106, hypothetical protein). The MapMan  
262 functional enrichment analysis of PDAs from these genes' expression lines can provide some insight into  
263 their potential role. For Sapur.15WG068800, enriched terms included phosphorylation, carrier-mediated  
264 transport, and solute transport channels, which suggest a role in regulating transmembrane transport. In  
265 the lines with expression of Sapur.15WG074900, the exceptional number of PDAs observed (5,318) is  
266 particularly interesting. Sapur.15WG074900 is a hypothetical protein that unique to Chr15W and female  
267 *S. purpurea* and shows high levels of RNA expression in female catkins, but lacks a homolog in  
268 Arabidopsis, despite lacking an Arabidopsis homolog. The closest homologs of this gene in *P. trichocarpa*  
269 and *P. deltoides* and are also uncharacterized (Tuskan et al., 2006; Goodstein et al., 2011; Hyden et al.,  
270 2021). Nevertheless, the large number of floral PDAs suggest that this gene likely has conserved patterns  
271 of transcriptional activation in Arabidopsis. The MapMan enrichment categories from the proteomic  
272 data suggest a potential role in either directly or indirectly regulating RNA or protein modification and  
273 stability. Sapur.15WG075700 is another gene annotated as a hypothetical protein and appears to be  
274 unique to *Salix*, as there are no homologs in either *Arabidopsis* or *Populus* (Tuskan et al., 2006; Lamesch

275 et al., 2012). Among the MapMan enriched terms for Sapur.15WG075700 PDAs were microfilament  
276 network, primary active transport, and fatty acid metabolism, which together could suggest a role in  
277 intracellular transport.

278 The *ARR17*-OX and *GATA15*-OX lines stood out in this study as having an exceptional number of PDAs  
279 when compared with most of the other lines, as well as unique differential expression of multiple  
280 proteins with floral development annotations (Tables 1-2, Fig. 2). The downregulation of *PISTILLATA* in  
281 the *ARR17* expression lines is particularly interesting. *PISTILLATA* is a well-characterized B-class MADS  
282 box gene that is necessary for stamen development (Krizek and Meyerowitz, 1996), which in *S. purpurea*  
283 has also been confirmed to have exceptionally high expression in males (Hyden et al., 2021). *ARR17* is  
284 hypothesized to act as a switch from male to female development in *Populus* species through the  
285 downregulation of *PISTILLATA* expression (Cronk and Müller, 2020). The results from this study support  
286 a similar mechanism in *S. purpurea*. Downregulation of *PISTILLATA*, and multiple tapetum and pollen  
287 development genes identified exclusively in the *ARR17*-OX lines, along with the differential expression of  
288 over 4,300 floral proteins, provides the first functional evidence supporting a role of *ARR17* as a master  
289 regulator of sex determination in *S. purpurea*, functioning in the suppression of male floral development  
290 (Fig. 3).

291 *GATA15* is a proposed master regulator gene of sex determination in *S. purpurea* that shows female-  
292 specific expression in mature catkins as well as differential expression in females in early floral shoot  
293 development (Carlson et al., 2017; Hyden et al., 2021). It is also the only candidate sex determination  
294 gene that is still present on Chr15W in monoecious willows, as other putative master regulator genes  
295 were deleted. These monoecious genotypes contain a Chr15W with structural variation and produce  
296 both male and female flowers. The presence of *GATA15* and *ARR17* has led us to hypothesize that the  
297 role of *GATA15* is to promote female development (Hyden et al., 2023). *GATA15* homologs have been  
298 shown to have a role in floral development in *Arabidopsis* and *Lagerstroemia speciosa* (Ranftl et al.,  
299 2016; Hu et al., 2019). In the present study, expression of *S. purpurea* *GATA15* produced the greatest  
300 number of floral PDAs, including several with annotations related to floral development and transition,  
301 consistent with previous data that show *GATA15* is expressed early in the transition from vegetative to  
302 floral meristem identity when catkin development is determined (Zhang and Fernando, 2005; Carlson et  
303 al., 2017). Moreover, among the most downregulated genes in the *GATA15* lines were two isoforms of  
304 *LEUNIG*, which is involved in gynoecium development and whose knockout in *Arabidopsis* has been  
305 shown to convert sepals to carpels, reduce stamen number, and alter expression on *PISTILLATA*,

306 *AGAMOUS*, *AP3*, and *AP1* MADS-box genes (Liu and Meyerowitz, 1995; Lamesch et al., 2012). These  
 307 proteomic results further support the hypothesized role of *GATA15* as a master regulator of sex  
 308 determination in *S. purpurea* with an involvement in female floral development.

309 Taken together, the floral proteomic data from this study indicate that of the genes tested *GATA15* and  
 310 *ARR17* are the most likely to be master regulators of sex determination in *S. purpurea*, with *ARR17* likely  
 311 suppressing male flower development and *GATA15* promoting female flower development (Fig. 3). Such  
 312 a system is consistent with the two-gene model of sex determination, which is common among  
 313 angiosperms (Charlesworth, 2002) and has been identified in other species, including garden asparagus  
 314 (Harkess et al., 2020) and kiwifruit (Akagi et al., 2019).

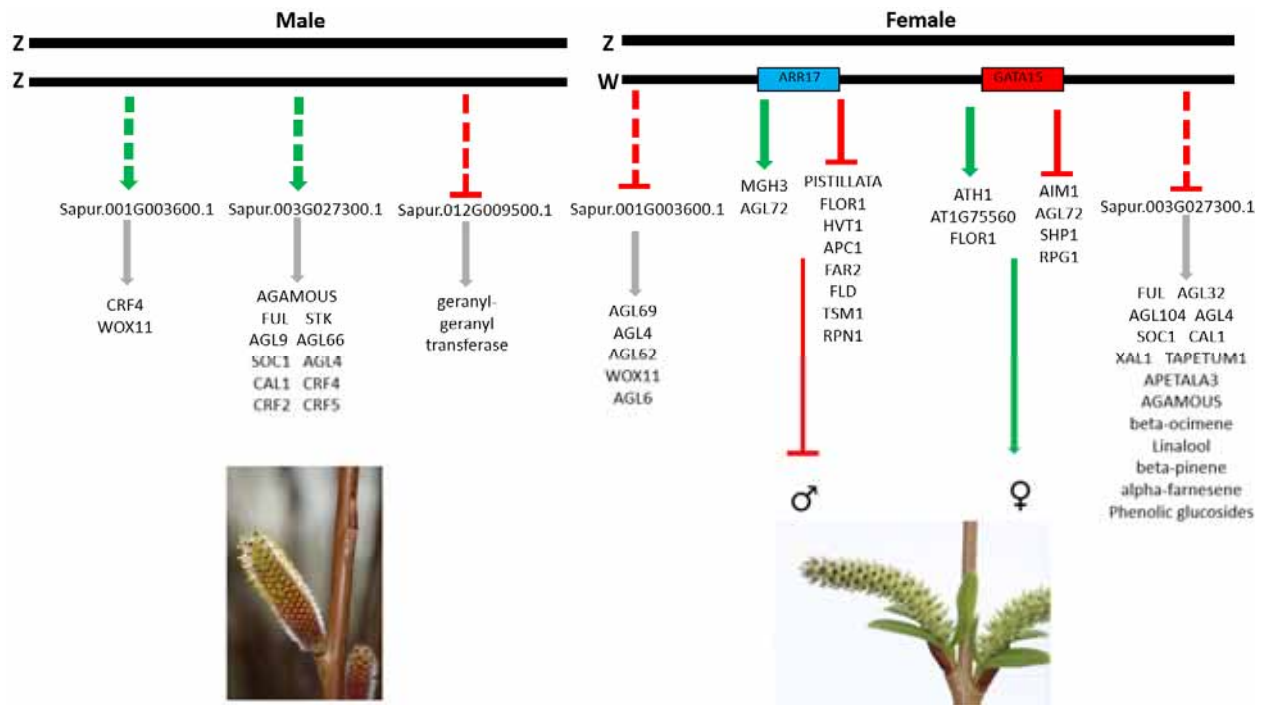

315

316 **Figure 3.** Model for regulation of sex determination in *S. purpurea*. Males represent the default sex  
 317 when the W chromosome is absent. Genes predicted to be up (green arrow) and down (red line)  
 318 regulated by the putative master regulators *ARR17* and *GATA15* are shown, which result in simultaneous  
 319 suppression of male floral development and promotion of female floral development, respectively.  
 320 Predicted targets of each DAP-Seq transcription factor in males and females that have likely involvement  
 321 in sex dimorphism are listed, although the exact regulation of expression of each DAP-Seq gene is  
 322 unknown.

323

324

325

326 *DAP-Seq*

327 Of the three transcription factors (TFs) that produced consistent binding motifs and large number of  
328 significant peaks, two (Sapur.001G003600.1 and Sapur.003G027300.1) have eQTL that map to the SDR  
329 and are predicted to be genes in the sex dimorphism pathway that are regulated either directly or  
330 indirectly by the master regulator genes of sex (Hyden et al., 2021), while Sapur.15WG062800.1  
331 (*GATA15*) is a candidate master regulator gene. Among the genes targeted by the *AP2/ERF* TF  
332 Sapur.001G003600.1 were a *Wuschel*-like *WOX11* in both libraries, a cytokinin response factor 4 in the  
333 male 'Fish Creek', and four MADS-box genes: *AGL4*, *AGL6*, *AGL62*, and *AGL69*, in the female 94006. The  
334 *AGL4* target is particularly interesting, as it is involved in ovule development (Rounsley et al., 1995), and  
335 showed a 4.96-fold increase in TF binding in the 94006 library. This preponderance of MADS-box gene  
336 binding exclusively in the female library suggests a potential role of this TF in promoting female floral  
337 development.

338 Sapur.003G027300.1 exhibited binding near both floral development genes and secondary metabolism  
339 genes. Among the floral development genes with adjacent TF binding in both libraries were homologs of  
340 two *AGAMOUS*-like genes (involved stamen and ovule identity) (Mizukami and Ma, 1992), *AGL32* (ovule  
341 endothelial identity) (De Folter et al., 2006), and *AGL4* (ovule development) (Rounsley et al., 1995),  
342 pointing towards involvement of this gene in floral development in both sexes. In the 94006 library,  
343 Sapur.003G027300.1 binding sites were identified observed near *TAPETUM1*, *TPD1*, and *AP3* (Krzek and  
344 Meyerowitz, 1996; Yang et al., 2003; Lamesch et al., 2012), all of which are directly involved in stamen  
345 development and may suggest a role of this gene in downregulating male floral development in females.  
346 Furthermore, Sapur.003G027300.1 displayed binding near multiple cytokinin response factor genes  
347 exclusively in the male 'Fish Creek' library, indicating a role in regulating cytokinin in males. This is  
348 particularly interesting considering the proposed role of *ARR17*, a cytokinin response regulator, in sex  
349 determination in *S. purpurea* (Zhou et al., 2020; Hyden et al., 2021). Indeed, given that eQTL for this  
350 gene map to the sex determination region (Hyden et al., 2021), it is possible that *ARR17* may directly or  
351 indirectly regulate expression of Sapur.003G027300.1, although the precise mechanism for this remains  
352 unclear. Sapur.003G027300.1 also binds near a multitude of genes involved in terpenoid, phenolic  
353 glucoside, and flavonoid production in the 94006 library, including genes specifically annotated as being  
354 involved in production of beta-ocimene, beta-pinene, limonene, and alpha-farnesene. These  
355 aforementioned compounds are terpenoids that are differentially produced in male and female *S.*  
356 *purpurea* catkins and are associated with pollinator and pest attraction (Keefover-Ring et al., 2022). TF

357 binding activity near genes responsible for production of these metabolites in 94006 but not ‘Fish Creek’  
358 suggests that, under the presence of the Chr15W and the sex determination genes, the CpG methylation  
359 profile is altered, which in turn affects TF binding and regulation of these metabolites in females  
360 resulting in differential expression and sex dimorphism.

361 The DAP-Seq assay of Sapur.15WG062800 *GATA15*, a candidate master regulator gene, showed peaks  
362 associated with *ATH1* and a CCHC Zinc finger in 94006. *ATH1* is activated by the C class MADS box gene  
363 *AGAMOUS*, and in turn regulates GA synthesis (Gómez-Mena et al., 2005). The CCHC Zinc finger targeted  
364 by *GATA15* is also described as having a likely role in reproductive development in Arabidopsis (Lamesch  
365 et al., 2012). This binding activity of Sapur.15WG062800 was only observed in the female 94006 library.  
366 These data are consistent with previous research hypothesizing *GATA15* as a female-specific master  
367 regulator gene of sex in *S. purpurea* with a role in promoting female floral development (Hyden et al.,  
368 2023).

369 The targeting of different gene families involved in sex dimorphism between male and female libraries  
370 was consistently observed across three transcription factors tested with DAP-Seq and further supports a  
371 role for CpG methylation, which is nearly three-fold higher in male *S. purpurea* catkins compared to  
372 females, in sex dimorphism (Hyden et al., 2021).

### 373 *Comparison of Arabidopsis heterologous expression and DAP-Seq results*

374 Among the *Salix* genes tested in this study, the CCHC zinc finger Sapur.15WG098800 gene and *GATA15*  
375 Sapur.15WG062800 gene were both analyzed through heterologous expression in Arabidopsis and in  
376 DAP-Seq assays, due to their annotation as transcription factors and hypothesized role as master  
377 regulators of sex. In both cases, the DAP-Seq and proteomics results provided complementary data  
378 supporting or rejecting a role in sex determination. For the CCHC zinc finger Sapur.15WG068800 gene,  
379 the fewest PDAs were observed (103) out of any of the transgenic Arabidopsis lines, and the DAP-Seq  
380 results indicated only seven and one significant peaks in the female and male libraries, respectively.  
381 Moreover, none of these PDAs or genes adjacent to DAP-Seq peaks had annotations that would suggest  
382 a role in regulating sex determination. From these data, the precise function of Sapur.15WG06800  
383 remains inconclusive, but a role in regulating sex determination seems unlikely. For *GATA15* on the  
384 other hand, both the DAP-Seq and the Arabidopsis expression data supported a potential role in sex  
385 determination as a promoter of female development, with the greatest number of PDAs in the

386 Arabidopsis heterologous expression lines, multiple floral development proteins with unique abundance  
387 patterns, and DAP-Seq peaks near two well-characterized floral development genes.

388 In summary, results from this study support the role of *ARR17* and *GATA15* as master regulator genes of  
389 sex determination in *S. purpurea*. *ARR17* appears to suppress expression of *PISTILLATA* and tapetum  
390 development genes, implicating a role as a male suppressor gene, while *GATA15* appears to promote  
391 female floral development by regulating expression of floral transition and ovule development genes,  
392 including *LEUNIG*. This system is clearly distinct from the single-gene system in *Populus* and underscores  
393 the dynamic nature of the sex determination system in the Salicaceae family.

## 394 **Materials and Methods**

### 395 *Generation and evaluation of Arabidopsis heterologous expression lines*

396 *Salix purpurea* genes used for heterologous expression in Arabidopsis were obtained from the list of  
397 eight candidate sex-determination genes described in a previous study (Hyden et al., 2021) including  
398 Arabidopsis Response Regulator 17 (*ARR17*) (Sapur.15WG073500), Double-stranded RNA-Binding 1  
399 (*DRB1*) (Sapur.15WG074300), a CCHC zinc finger nuclease (Sapur.15WG068800), *GATA15*  
400 (Sapur.15WG062800), and two genes annotated as hypothetical proteins (Sapur.15WG074900,  
401 Sapur.15WG075700). One gene, Sapur.15WG074400, a homolog of *AGO4*, did not contain either a start  
402 codon or a canonical stop codon, and was therefore dropped from further consideration. Attempts to  
403 clone Sapur15WG075300, annotated as a hypothetical protein, did not produce any colonies containing  
404 the transgene in *E. coli*, suggesting that it may result in a toxic product, and therefore this gene was also  
405 dropped from further consideration. *Salix purpurea* homologs of *Flowering Locus T* (*FT*,  
406 Sapur.008G061900) and *LEAFY* (Sapur.15WG122200) were included as positive controls to test the  
407 effectiveness of the transformation methods and validity of the results, since their role and function are  
408 well characterized in Arabidopsis. All coding sequences (CDS) were obtained from the *S. purpurea*  
409 female 94006 v5.1 reference (Zhou et al., 2020) available on Phytozome (Goodstein et al., 2011). CDSs  
410 were synthesized as gblocks by Integrated DNA Technologies (Coralville, IA, USA) and contained 30 bp  
411 and 26 bp overlap sequences homologous to the pGFPGUSPlus vector (Vickers et al., 2007) on the 3' and  
412 5' ends, respectively, along with a six His tail immediately prior to the stop codon. NEBuilder HiFi DNA  
413 assembly (New England Biolabs, Ipswich, MA, USA) was used to assemble each gblock into the  
414 pGFPGUSPlus vector, replacing the GFP CDS adjacent to a 35S promoter (Supplemental Datasets S1-S8).  
415 Each vector contained plant selectable markers for GUS and hygromycin, also driven by 35S promoters,



416 as well as a bacterial selectable marker for kanamycin resistance. Assembled constructs were used to  
417 transform chemically competent TOP10 *E. coli* cells obtained from ThermoFisher (Waltham, MA, USA)  
418 following the manufacturer's protocol. Successful insertion of each gblock in the correct orientation was  
419 confirmed by restriction digest and PCR amplification using Q5 polymerase (New England Biolabs,  
420 Ipswich, MA, USA) followed by Sanger sequencing of plasmid DNA in the Cornell University Institute for  
421 Biotechnology (Ithaca, NY, USA). Plasmid DNA was extracted from *E. coli* cells using a miniprep kit from  
422 Qiagen (Germantown, MD, USA) following the recommended protocol. *Agrobacterium tumefaciens*  
423 GV3101 cells were transformed using a standard electroporation protocol, and insertion of each plasmid  
424 and gene of interest were confirmed with PCR using Q5 polymerase followed by Sanger sequencing.  
425 Columbia-0 ecotype Arabidopsis was transformed by floral dip following the protocol described by  
426 (Zhang et al., 2006). T<sub>1</sub> generation Arabidopsis seeds were grown on standard MS media containing  
427 hygromycin for selection of transformants at 30 µg L<sup>-1</sup> and surviving seedlings were transferred to  
428 potting mix. The presence of each transgene was confirmed using PCR from genomic DNA followed by  
429 Sanger sequencing of PCR products. Four to six T<sub>1</sub> plants, each representing a unique transgene insertion  
430 event, were self-pollinated to generate T<sub>2</sub> seeds, which were grown on MS media containing 30 µg L<sup>-1</sup>  
431 hygromycin before being transferred to potting mix. All Arabidopsis were grown at 21°C under  
432 fluorescent lighting with an 8/16 hour photoperiod prior to bolting. Upon initiation of floral shoots, day  
433 length was switched to 16 hours. Plants were sub-irrigated regularly whenever the potting mix became  
434 dry. Expression of the plasmid in floral tissue of T<sub>2</sub> plants was confirmed by GUS staining assay following  
435 the manufacturer's protocol (Millipore Sigma, Burlington, MA, USA) (Figure S6). Floral buds from three  
436 T<sub>2</sub> plants (biological replicates) with confirmed gene insertion events for each event were harvested  
437 prior to anthesis, flash frozen in liquid nitrogen, and stored at -80°C.

#### 438 *Protein Extraction and Proteome Analysis*

439 Three floral buds collected prior to anthesis from each from three biological replicates (full sibling T<sub>2</sub>  
440 plants) for each transgenic insertion event were selected for proteomics. Floral buds were ground in  
441 liquid nitrogen using 2.3mm zirconia/silica beads with a Geno/Grinder 2010 (SPEX) at a rate of 1200rpm  
442 for 1 minute. Ground tissue was resuspended in 200µL of lysis buffer (4% sodium dodecyl sulfate, 10mM  
443 dithiothreitol) and incubated for 10 minutes at 90°C with constant shaking. Proteins were alkylated with  
444 30mM iodoacetamide and incubated in the dark for 15 minutes to prevent the reformation of disulfide  
445 bonds. For each sample, all of the crude protein extract was transferred to a fresh tube, Sera-Mag beads  
446 were added (100µg), and proteins were extracted by protein aggregation capture (Batth et al., 2019).

447 Precipitated protein was resuspended in 100mM ammonium bicarbonate (ABC) and then digested with  
448 two separate and sequential aliquots of sequencing grade trypsin (Promega) in the ratio of 1:75 trypsin  
449 to sample protein ratio overnight followed by a 3-hr digestion. Peptide mixtures were adjusted to 0.5%  
450 formic acid (FA) and physically separated from the Sera-Mag beads with an AcroPrep Advance 96-well  
451 10KDa omega filter plate (Pall Corporation) by centrifuging at 1500xg for 30 minutes. Peptides were  
452 freeze dried (Labconco FreeZone 72040) and then resuspended in an aqueous solvent (0.1% formic acid,  
453 5% ACN). Peptide concentrations were estimated using a Nanodrop One spectrophotometer. For each  
454 sample, 2µg aliquots were measured by one-dimensional liquid chromatography tandem mass  
455 spectrometry (1D-LC-MS/MS) using a RSLCnano UHPLC system (Thermo Scientific) coupled to a Q  
456 Exactive Plus mass spectrometer (Thermo Scientific). Peptide mixtures were first injected across an in-  
457 house built strong cation exchange (SCX) Luna trap column (5 µm, 150 µm X 50mm; Phenomenex, USA)  
458 followed by a nanoEase symmetry reverse phase (RP) C18 trap column (5 µm, 300 µm X 50mm; Waters,  
459 USA) and then washed with the aqueous solvent. A 1M ammonium acetate inject was used to elute  
460 peptides to the C18 trap column, which was then switched to be in-line with an in-house pulled  
461 nanospray emitter analytical column (75 µm X 350 mm) packed with Kinetex RP C18 resin (1.7 µm;  
462 Phenomenex, USA). Peptides were separated over a 160-minute linear gradient from 2 to 25% of mobile  
463 phase (0.1% FA, 80% ACN) at a flow rate of 250nL/min and analyzed using a Top10 data dependent  
464 acquisition strategy (Villalobos Solis et al., 2019). All MS data were acquired with Thermo Xcalibur  
465 (version 4.2.47) and analyzed using the Proteome Discoverer software (Thermo-Fisher Scientific, version  
466 2.5) (Orsburn, 2021). Each MS raw data file was processed by the SEQUEST HT database search  
467 algorithm (Eng et al., 1994) and confidence in peptide-to-spectrum (PSM) matching was evaluated by  
468 Percolator (Käll et al., 2007). The TAIR 11 reference genome (Lamesch et al., 2012) was used for  
469 mapping proteins. Peptide and PSMs were considered identified at  $q < 0.01$  and proteins were required  
470 to have at least one unique peptide sequence. Proteins with at least one unique peptide were exported  
471 from Proteome Discoverer. Log<sub>2</sub>-transformation of protein abundances was performed followed by  
472 local regression (LOESS) normalization and mean-centering across the entire dataset in R using scripts  
473 from the InfernoRDN software (v1.1.7995) (Larsson, 2014). The abundance values for proteins with  
474 missing values were imputed with random values drawn from the normal distribution (width 0.3,  
475 downshift 2.2) using R. Proteins of differential abundance (PDAs) were calculated using the “limma”  
476 package in R (Ritchie et al., 2015) by comparing all events and biological replicates for each  
477 overexpressed gene against the pGFPUSPlus empty vector controls. Volcano plots were generated  
478 using EnhancedVolcano (v.1.13.2) (Blighe et al., 2018) with a fold change cutoff of 2 and p-value

479 threshold of 0.01. Mapman functional categories (Schwacke et al., 2019) were assigned to each FASTA  
480 sequence using the Mercator4 online submission tool  
481 (<https://www.plabipd.de/portal/web/guest/mercator4>). Functional enrichment for MapMan categories  
482 was performed for each gene expression relative to the empty vector control using clusterProfiler  
483 (v.4.2.2) (Wu et al., 2021). Briefly, each protein was assigned to a MapMan category, significantly  
484 differentially enriched proteins ( $|\log_{2}FC| > 2$  and  $p.val < 0.05$ ) were used as the differentially enriched  
485 genes, while all genes in each comparison were used as background. Each differentially abundant  
486 protein set was searched for genes with annotations that are well characterized in floral development.

#### 487 *Transcription factor cloning for DAP-Seq*

488 Genes for DAP-Seq analysis were selected from among 97 transcription factors (TFs) identified as having  
489 a potential role as top level regulator genes of sex determination from an eQTL study (Hyden et al.,  
490 2021). These genes were prioritized based on transcription factor family, likelihood of success in a DAP-  
491 Seq assay, functional annotation, and floral differential gene expression (O'Malley et al., 2016; Hyden et  
492 al., 2021). The 11 genes with the highest prioritization score were advanced for DAP-Seq analysis (Table  
493 2). TF CDS regions were successfully cloned via RT-PCR from catkin RNA obtained from the *S. purpurea*  
494 317 F<sub>2</sub> family (Hyden et al., 2021), or were generated using gblocks from IDT based on the female 94006  
495 v5.1 reference genome (Zhou et al., 2020). Each of the 11 genes were cloned into a pENTR-DTOPO  
496 vector and finally into a pIX-HALO expression vector using a Gateway cloning kit obtained from NEB and  
497 following the manufacturer's protocol (Supplemental Datasets S9-S19). PCR followed by Sanger  
498 sequencing of plasmid DNA was used to confirm the presence and correct sequence and orientation of  
499 each CDS sequence in the entry and destination vectors. Genomic DNA for the DAP-Seq assay was  
500 extracted from catkins of female (clone 94006) and male (clone 'Fish Creek') *S. purpurea* using a  
501 modified Qiagen plant mini kit protocol.

#### 502 *DAP-Seq experiments*

503 DAP-Seq experiments were conducted as described previously in (O'Malley et al., 2016), with minor  
504 modifications, described in (Baumgart et al., 2021). DNA libraries were prepared by fragmenting  
505 genomic DNA of either *S. purpurea* 'Fish Creek' or *S. purpurea* 94006 using a Covaris LE220-Plus focused-  
506 ultrasonicator (Covaris), followed by library preparation with the KAPA HyperPrep kit (Roche) following  
507 the manufacturer's recommendations. Insert sizes were targeted to an average of 150 bp. Before use in  
508 the DAP-seq assay, libraries were PCR amplified for 10 cycles.

509 For *in vitro* protein expression, linear fragments were first PCR amplified from each pIX-HALO plasmid  
 510 using primers targeting the upstream T7 promoter (5' GTGAATTGTAATACGACTCACTATAGGG 3') and  
 511 downstream of the poly-A stretch (5' CAAGGGGTTATGCTAGTTATTGCTC 3'). The correct size of each PCR  
 512 product was verified using a TapeStation (Agilent Technologies), and PCR products were purified using  
 513 SPRI beads. Transcription factors were expressed using at least 2000 ng PCR product per sample with  
 514 the TnT T7 Quick for PCR DNA in vitro protein expression kit (Promega). All reaction volumes were  
 515 doubled to yield a total of 100  $\mu$ L protein product per transcription factor. Each DAP-Seq reaction was  
 516 run with 100  $\mu$ L expressed protein, 150 ng of the previously prepared fragment library, and 15  $\mu$ g  
 517 salmon sperm DNA to reduce non-specific binding. The final DAP-seq libraries were pooled for  
 518 sequencing on a NovaSeq using the S4 flowcell (Illumina), targeting 30 million 2x150 reads per sample.  
 519 Primary data analyses included quality filtering, alignment to the reference genome, peak-calling, and  
 520 gene assignment as described in (Baumgart et al., 2021). Binding motifs for transcription factors were  
 521 predicted using MEME version 5.3.0 (Bailey and Elkan, 1994).

522

## 523 Tables

524 **Table 1.** Total, differentially abundant proteins (PDA), and unique PDA determined for each transgenic  
 525 heterologous expression line in Arabidopsis.

| Construct | Expressed Gene   | Gene Annotation                    | Events | Total Proteins | PDA (FDR < 0.05) | Unique PDA |
|-----------|------------------|------------------------------------|--------|----------------|------------------|------------|
| pBH100    | Sapur.15WG073500 | <i>ARR17</i> response regulator    | 6      | 16,684         | 4305             | 1236       |
| pBH101    | Sapur.15WG062800 | <i>GATA15</i> transcription factor | 4      | 16,609         | 5970             | 1953       |
| pBH102    | Sapur.15WG068800 | CCHC Zinc Finger                   | 4      | 16,023         | 103              | 45         |
| pBH103    | Sapur.15WG074300 | <i>DRB1</i> dsRNA binding          | 6      | 12,306         | 343              | 110        |
| pBH104    | Sapur.15WG074900 | Hypothetical Protein               | 5      | 16,885         | 5318             | 1041       |
| pBH106    | Sapur.15WG075700 | Hypothetical Protein               | 4      | 11,355         | 611              | 137        |
| pBH107    | Sapur.15WG122200 | <i>LEAFY</i>                       | 5      | 12,271         | 444              | 65         |
| pBH108    | Sapur.008G061900 | <i>Flowering Locus T</i>           | 5      | 11,928         | 179              | 57         |

526

527

528 **Table 2.** Floral and reproductive development genes showing differential expression unique to either  
 529 *ARR17* or *GATA15* expression lines. log<sub>2</sub>FC, log<sub>2</sub> fold-change; FDR, false discovery rate

| OX Gene | Arabidopsis Gene | log <sub>2</sub> FC | FDR      | Annotation                                                                                    |
|---------|------------------|---------------------|----------|-----------------------------------------------------------------------------------------------|
|         | AT1G19890.1      | 5.42                | 2.03E-02 | male-gamete-specific histone H3, <i>MALE-GAMETE-SPECIFIC HISTONE H3</i>                       |
|         | AT5G51860.2      | 1.80                | 4.54E-02 | <i>AGAMOUS</i> -like 72                                                                       |
|         | AT3G12145.1      | -1.02               | 4.12E-02 | <i>FLOR1, FLORAL TRANSITION AT THE MERISTEM</i>                                               |
|         | AT2G30800.2      | -1.36               | 4.24E-02 | helicase in vascular tissue and tapetum                                                       |
|         | AT5G05560.1      | -1.87               | 4.52E-02 | pollen calcium-binding protein 1, <i>EMBRYO DEFECTIVE 2771</i> , anaphase promoting complex 1 |
| ARR17   | AT5G05560.3      | -2.01               | 2.57E-02 | pollen calcium-binding protein 1, <i>EMBRYO DEFECTIVE 2771</i> , anaphase promoting complex 1 |
|         | AT3G11980.1      | -2.75               | 2.98E-02 | <i>FATTY ACID REDUCTASE 2, MALE STERILITY 2</i>                                               |
|         | AT5G20240.2      | -3.02               | 7.83E-03 | <i>PISTILLATA</i>                                                                             |
|         | AT3G10390.3      | -3.03               | 4.59E-03 | <i>FLOWERING LOCUS D</i> , Reduced Systemic immunity 1                                        |
|         | AT1G67990.1      | -3.28               | 3.33E-02 | <i>TAPETUM-SPECIFIC METHYLTRANSFERASE 1</i>                                                   |
|         | AT3G10390.2      | -3.37               | 2.55E-04 | <i>FLOWERING LOCUS D</i> , Reduced Systemic immunity 1                                        |
|         | AT3G10390.1      | -3.54               | 1.56E-04 | <i>FLOWERING LOCUS D</i> , Reduced Systemic immunity 1                                        |
|         | AT3G10390.4      | -3.54               | 3.72E-04 | <i>FLOWERING LOCUS D</i> , Reduced Systemic immunity 1                                        |
|         | AT1G25260.1      | -6.50               | 1.43E-08 | <i>REDUCED POLLEN NUMBER 1, REDUCED POLLEN NUMBER</i>                                         |
|         | AT3G12145.1      | 0.79                | 4.07E-04 | <i>FLOR1, FLORAL TRANSITION AT THE MERISTEM</i>                                               |
|         | AT4G29010.1      | -1.31               | 4.93E-02 | <i>ABNORMAL INFLORESCENCE MERISTEM</i>                                                        |
|         | AT3G58780.3      | -1.37               | 1.76E-02 | <i>SHATTERPROOF 1, AGAMOUS</i> -like 1                                                        |
| GATA15  | AT3G58780.2      | -1.42               | 2.64E-02 | <i>SHATTERPROOF 1, AGAMOUS</i> -like 1                                                        |
|         | AT5G51860.1      | -2.43               | 4.76E-03 | <i>AGAMOUS</i> -like 72                                                                       |
|         | AT5G51860.2      | -2.45               | 1.37E-03 | <i>AGAMOUS</i> -like 72                                                                       |
|         | AT5G40260.1      | -6.42               | 1.27E-07 | <i>RUPTURED POLLEN GRAIN1</i>                                                                 |
|         | AT4G32551.1      | -10.60              | 1.55E-08 | <i>ROTUNDA2, LEUNIG</i>                                                                       |
|         | AT4G32551.2      | -10.55              | 6.10E-09 | <i>ROTUNDA2, LEUNIG</i>                                                                       |

530

531

532 **Table 3.** Analyzed transcription factors and libraries with total number of significant summits and target  
 533 genes from DAP-Seq analysis.

| Library      | Salix Gene ID      | Description                         | TF Source                 | Summit fold-change > 10 | Summit fold-change > 5 | Summit fold-change > 3 | Total Target Genes |
|--------------|--------------------|-------------------------------------|---------------------------|-------------------------|------------------------|------------------------|--------------------|
|              | Sapur.001G003600.1 | <i>AP2/ERF</i> transcription factor | RT-PCR<br>10X-317-124 (M) | 12                      | 351                    | 1082                   | 1293               |
|              | Sapur.003G027300.1 | Homeodomain-like protein            | RT-PCR<br>11X-317-194 (F) | 36                      | 1264                   | 5919                   | 9377               |
|              | Sapur.003G155500.1 | <i>scarecrow</i> -like 3            | gblock                    | 0                       | 0                      | 1                      | 7                  |
|              | Sapur.004G110200.3 | transcription factor <i>VRN1</i>    | gblock                    | 0                       | 0                      | 7                      | 21                 |
|              | Sapur.005G077400.1 | NAC transcription factor 030        | gblock                    | 0                       | 0                      | 17                     | 81                 |
| 94006        | Sapur.006G140600.1 | <i>CONSTANS</i> -like 5             | RT-PCR<br>11X-317-194 (F) | 0                       | 0                      | 1                      | 10                 |
|              | Sapur.007G074000.1 | WRKY transcription factor, putative | gblock                    | 0                       | 0                      | 7                      | 18                 |
|              | Sapur.012G009500.1 | <i>scarecrow</i> -like 18           | RT-PCR<br>11X-317-118 (F) | 0                       | 2                      | 12                     | 48                 |
|              | Sapur.017G014200.1 | GRAS family transcription factor    | gblock                    | 0                       | 1                      | 7                      | 21                 |
|              | Sapur.15WG062800.1 | <i>GATA</i> transcription factor 15 | gblock                    | 0                       | 3                      | 85                     | 150                |
|              | Sapur.15WG068800.1 | CCHC Zinc Finger                    | RT-PCR<br>11X-317-194 (F) | 0                       | 0                      | 7                      | 28                 |
|              | Sapur.001G003600.1 | <i>AP2/ERF</i> transcription factor | RT-PCR<br>10X-317-124 (M) | 5                       | 233                    | 541                    | 357                |
|              | Sapur.003G027300.1 | Homeodomain-like protein            | RT-PCR<br>11X-317-194 (F) | 56                      | 1952                   | 9148                   | 8336               |
|              | Sapur.003G155500.1 | <i>scarecrow</i> -like 3            | gblock                    | 0                       | 0                      | 3                      | 4                  |
|              | Sapur.004G110200.3 | transcription factor <i>VRN1</i>    | gblock                    | 0                       | 0                      | 4                      | 3                  |
|              | Sapur.005G077400.1 | NAC transcription factor 030        | gblock                    | 0                       | 0                      | 5                      | 7                  |
| 'Fish Creek' | Sapur.006G140600.1 | <i>CONSTANS</i> -like 5             | RT-PCR<br>11X-317-194 (F) | 0                       | 0                      | 0                      | 0                  |
|              | Sapur.007G074000.1 | WRKY transcription factor, putative | gblock                    | 0                       | 0                      | 7                      | 4                  |
|              | Sapur.012G009500.1 | <i>scarecrow</i> -like 18           | RT-PCR<br>11X-317-118 (F) | 0                       | 1                      | 23                     | 9                  |
|              | Sapur.017G014200.1 | GRAS family transcription factor    | gblock                    | 0                       | 0                      | 5                      | 5                  |
|              | Sapur.15WG062800.1 | <i>GATA</i> transcription factor 15 | gblock                    | 0                       | 8                      | 62                     | 28                 |
|              | Sapur.15WG068800.1 | CCHC Zinc Finger                    | RT-PCR<br>11X-317-194 (F) | 0                       | 0                      | 1                      | 1                  |

534

535

536 **Acknowledgements**

537 The authors are grateful for excellent technical support provided by Michael Quade, McKenzie Schessl,  
538 and Alexander Wares. We appreciate insightful comments on the manuscript from Steven DiFazio,  
539 Jeffrey Doyle, and Jocelyn Rose.

540

541 **Author Contributions**

542 B.L.H., J.G.C., X.Y., R.L.H., G.A.T., R.O., and L.B.S. designed the research; B.L.H., D.L.C., P.E.A., G.Y., T.Y.,  
543 L.B., Y.Z., C.C., and R.O. performed the experiments, B.L.H. wrote the paper with contributions from all  
544 authors.

545

546 **Funding**

547 This manuscript is based upon work supported by the U.S. Department of Energy (DOE), Office of  
548 Science, Office of Workforce Development for Teachers and Scientists, Office of Science Graduate  
549 Student Research (SCGSR) program. The SCGSR program is administered by the Oak Ridge Institute for  
550 Science and Education for the DOE under contract number DE-SC0014664. This study was also  
551 supported by The Center for Bioenergy Innovation, a US Department of Energy Research Center  
552 supported by the Office of Biological and Environmental Research in the DOE Office of Science. The work  
553 was also supported by the U.S. Department of Energy Joint Genome Institute, a DOE Office of Science  
554 User Facility, is supported under Contract No. DE-AC02-05CH11231. Oak Ridge National Laboratory is  
555 managed by UT-Battelle, LLC for the U.S. Department of Energy under Contract Number DE- AC05-  
556 00OR22725. The work conducted by the U.S. Department of Energy Joint Genome Institute, a DOE Office  
557 of Science User Facility, is supported under Contract No. DE-AC02-05CH11231. This work was partially  
558 funded by a graduate fellowship from USDA NIFA AFRI (Award #2021-67034-35116) and a grant from  
559 the National Science Foundation (DEB-1542486).

560 **Conflict of interest statement:** The authors declare no competing interests.

561 **Data Availability**

562 All proteomics spectral data in this study were deposited at the ProteomeXchange Consortium via the  
563 MASSIVE repository (<https://massive.ucsd.edu/>). The data can be reviewed under the username  
564 “reviewer\_MSV000091180” and password “BHArabidopsis”

565

566

567

568

569

570

## 571 Supplemental Figures

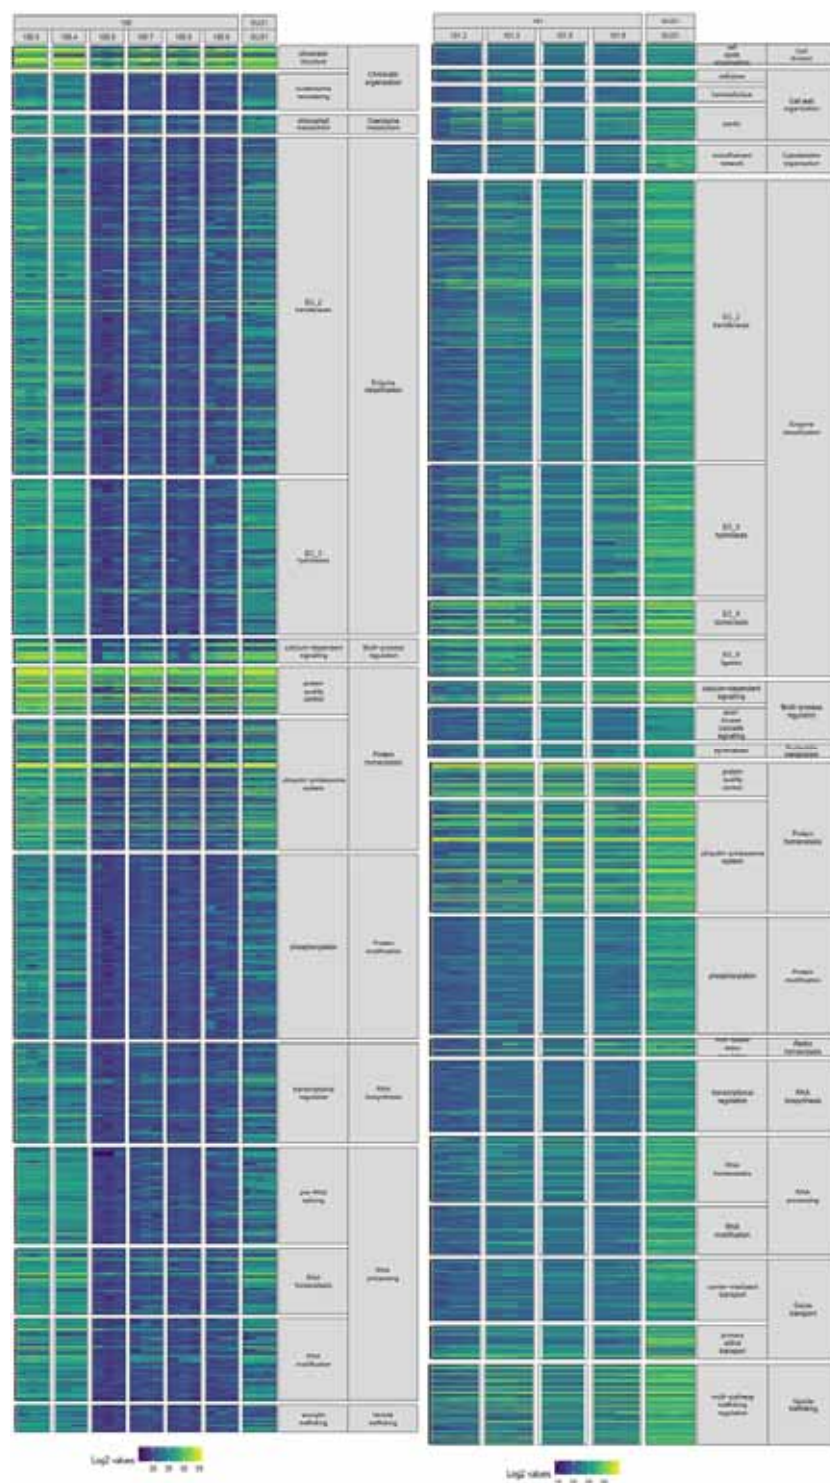

572

573 **Figure S1.** Heatmap displaying the total expression of significantly differentially abundant proteins in the  
 574 MapMan enriched functional categories for the *ARR17* (100) and *GATA15* (101) expression lines,  
 575 compared to the pGFPGUSPlus empty vector control (GUS1). Each column represents data from a  
 576 unique transgene event.



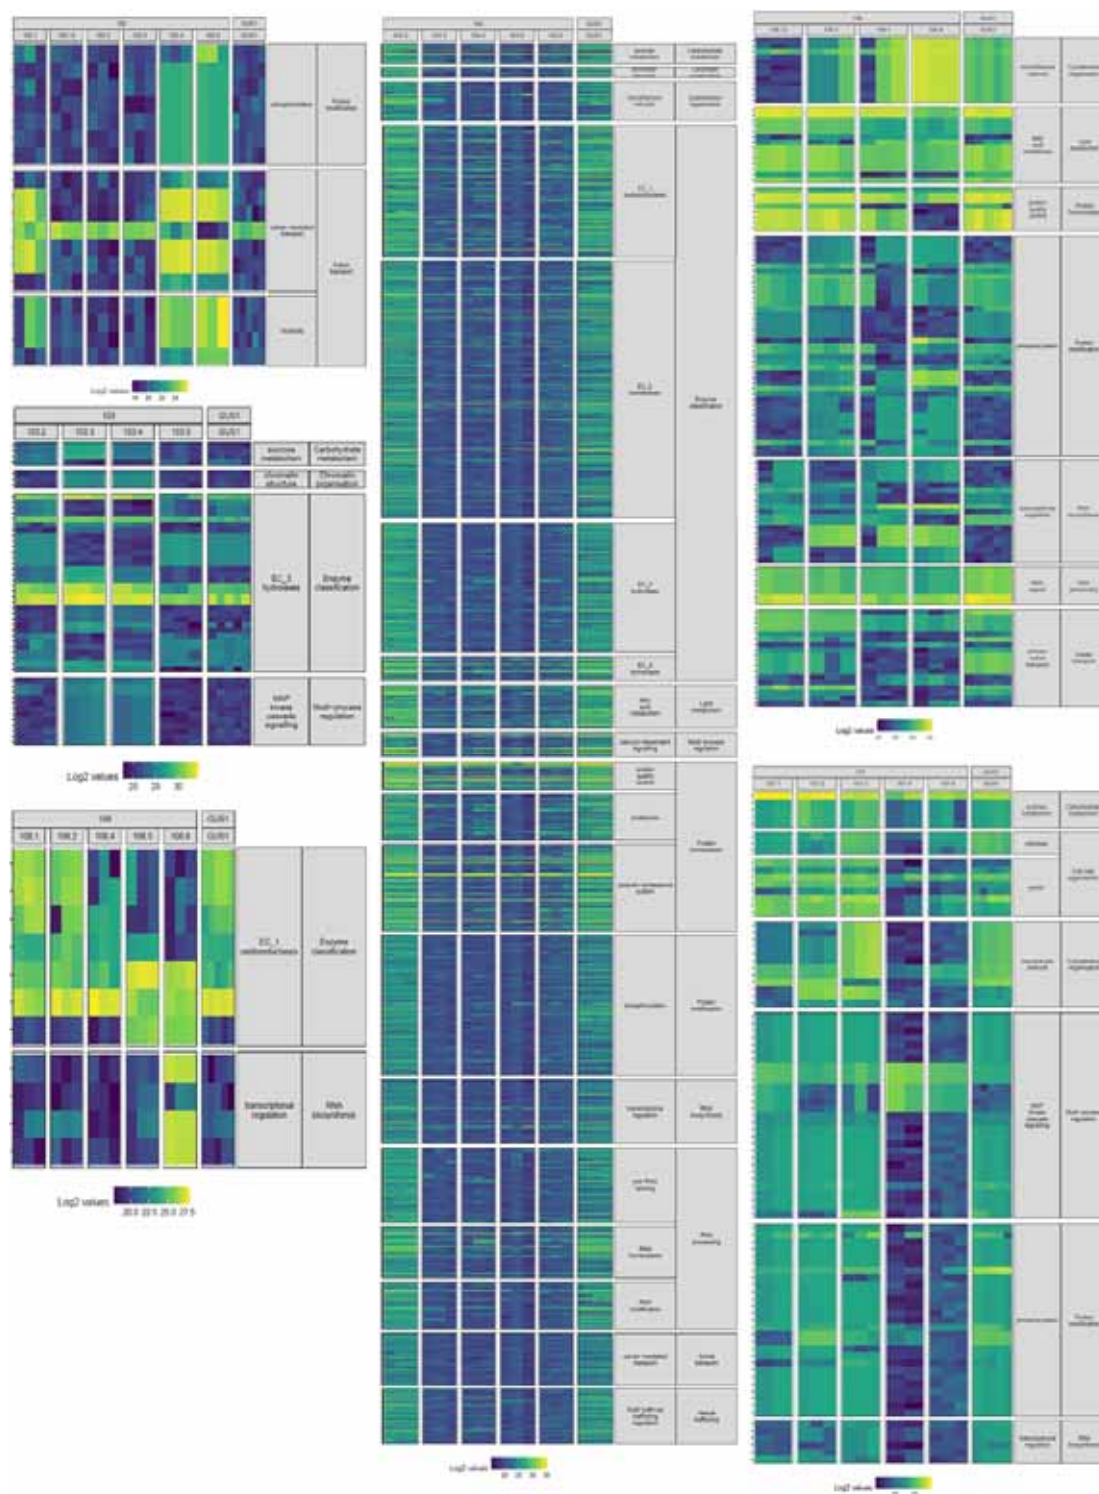

577

578 **Figure S2.** Heatmap displaying the total expression of each gene in the MapMan enriched functional  
 579 categories for the CCHC Zinc Finger (102) *DRB1* (103) Sapur.15WG074900 hypothetical protein (104),  
 580 Sapur.15WG075700 hypothetical protein (106), *LEAFY* (107), and *FT* (108) expression lines, compared to  
 581 the pGFPGUSPlus empty vector control (GUS1). Each column represents data from a unique transgene  
 582 event.

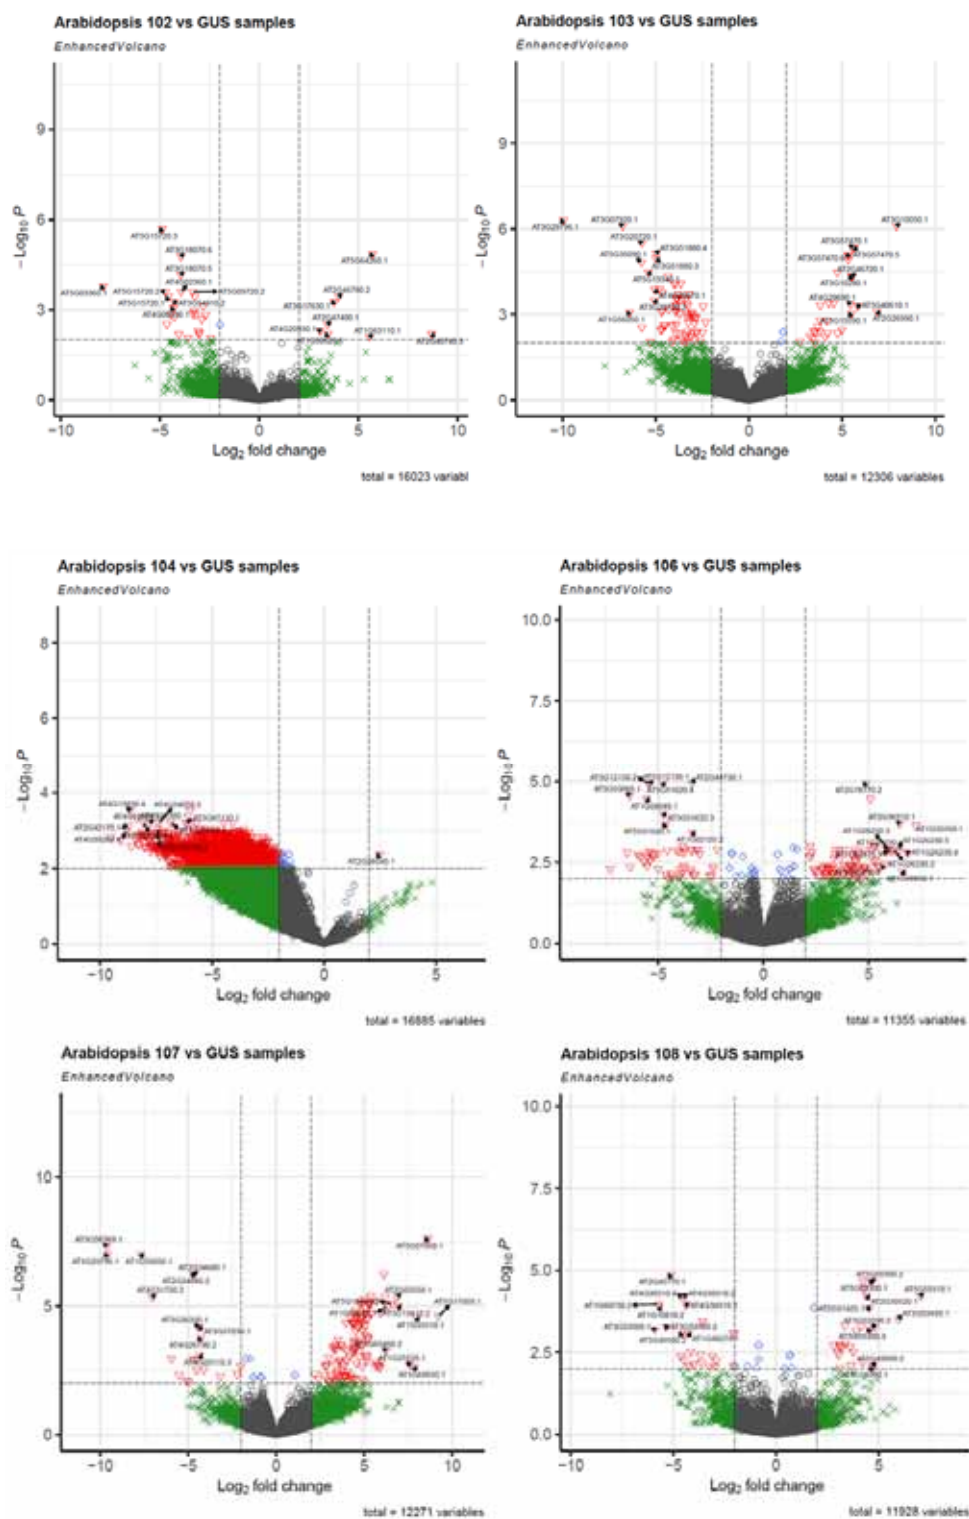

583

584 **Figure S3.** Volcano plots displaying the total differential abundant protein results and top ten significant  
585 up and down regulated proteins for the Sapur.15WG068800 CCHC Zinc Finger nuclease (102),  
586 Sapur.15WG074300 *DRB1* (103), Sapur.15WG074900 hypothetical protein (104), Sapur.15WG075700  
587 hypothetical protein (106), *LEAFY* (107), and *FT* (108) expression lines, relative to the empty vector  
588 control.

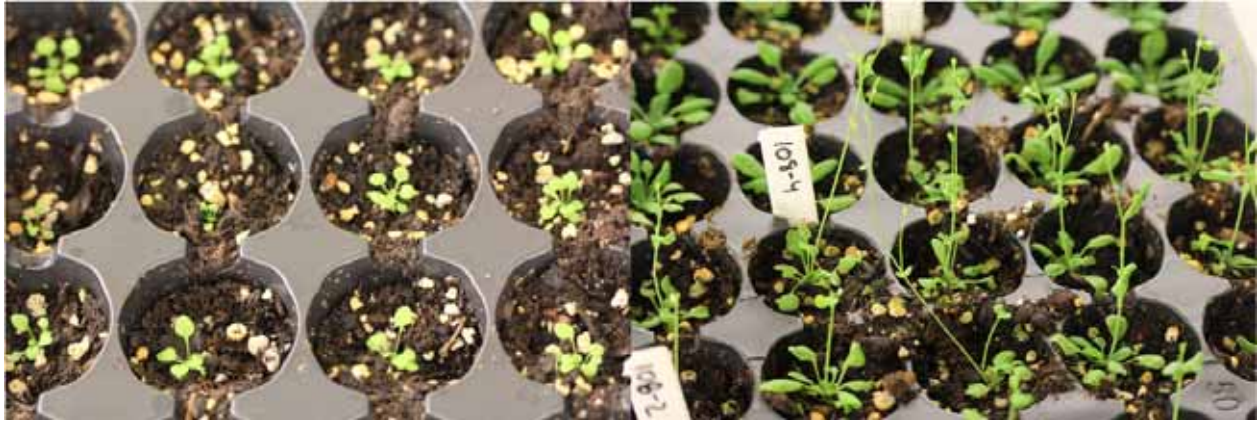

589

590 **Figure S4.** Comparison of Arabidopsis transformed with the empty vector control (left) and  
591 overexpressing *S. purpurea FT* (Sapur.008G061900, right)

592

593

594

### A 94006 Female library

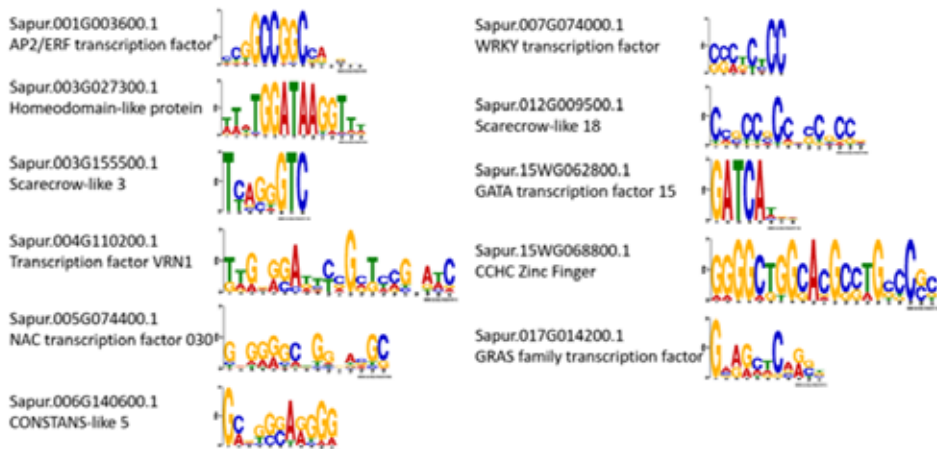

### B 'Fish Creek' Male library

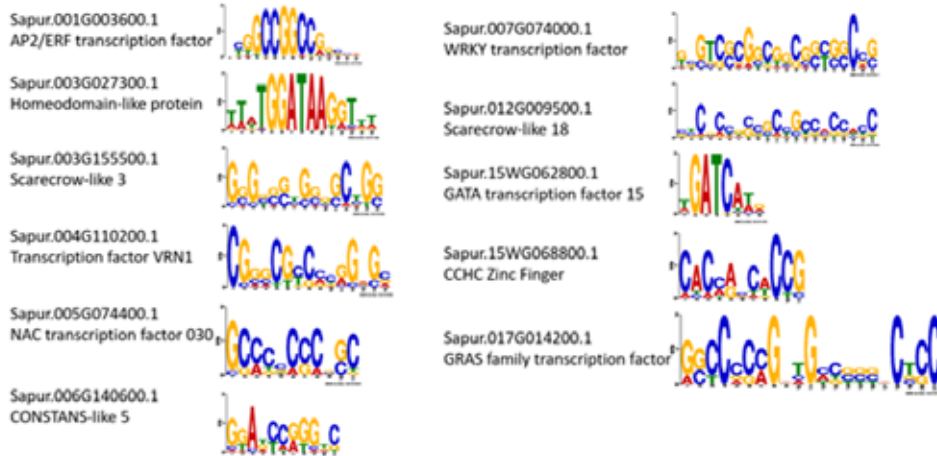

595

596 **Figure S5.** Predicted binding motifs for each transcription factor tested in DAP-Seq. A. Predictions from  
 597 the 94006 library (female); B. Predictions from the 'Fish Creek' library (male).

598

599

600

601

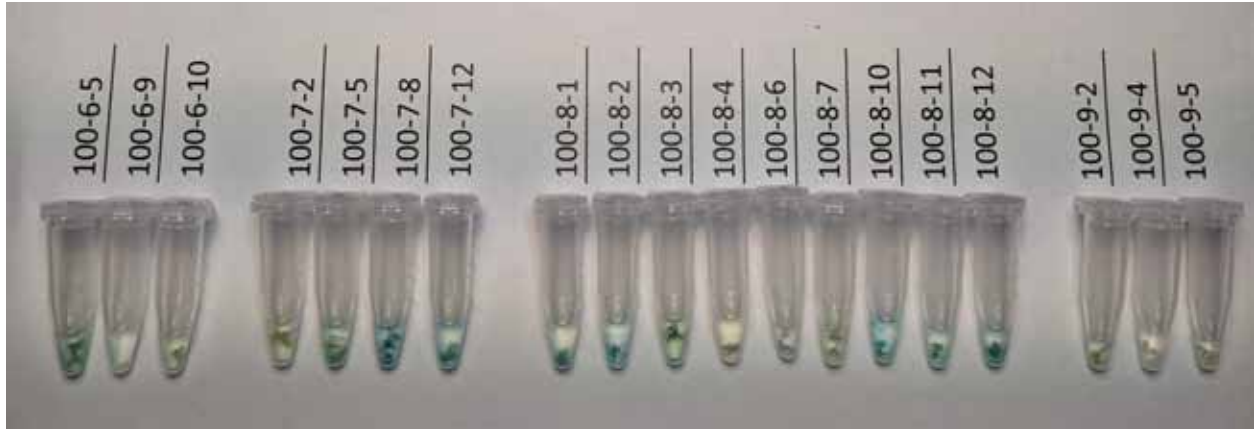

602

603 **Figure S6.** GUS staining assay results for representative samples of T<sub>2</sub> flowers after ethanol staining

604

605

606 **Supplemental Tables**

607 **Table S1.** Top 10 greatest up- and down-regulated proteins for each Arabidopsis expression line.

| OX Gene | Regulation    | Arabidopsis Gene | log2F C | FDR      | Description                               |
|---------|---------------|------------------|---------|----------|-------------------------------------------|
| ARR17   | Upregulated   | AT1G26770.1      | 7.25    | 3.11E-06 | EXPANSIN A10                              |
| ARR17   | Upregulated   | AT2G37640.1      | 6.90    | 7.36E-06 | EXPANSIN 3                                |
| ARR17   | Upregulated   | AT5G02260.1      | 6.69    | 1.77E-05 | EXPANSIN A9                               |
| ARR17   | Upregulated   | AT1G26770.2      | 6.64    | 9.90E-06 | EXPANSIN A10                              |
| ARR17   | Upregulated   | AT2G37640.2      | 6.41    | 2.50E-05 | EXPANSIN 3                                |
| ARR17   | Upregulated   | AT2G39700.1      | 6.36    | 2.50E-05 | EXPANSIN A4                               |
| ARR17   | Upregulated   | AT1G09560.1      | 5.89    | 6.77E-03 | PLASMODESMAL GERMIN-LIKE PROTEIN 1        |
| ARR17   | Upregulated   | AT1G13370.1      | 5.72    | 4.35E-03 | Histone superfamily protein               |
| ARR17   | Upregulated   | AT5G48940.1      | 5.50    | 5.20E-03 | RGF1 INSENSITIVE 2                        |
| ARR17   | Upregulated   | AT1G23250.2      | 5.42    | 1.77E-04 | Caleosin-related family protein           |
| ARR17   | Downregulated | AT2G43460.1      | -10.02  | 4.62E-10 | Ribosomal protein EL38Z                   |
| ARR17   | Downregulated | AT1G73080.1      | -9.69   | 2.05E-06 | PEP1 receptor 1                           |
| ARR17   | Downregulated | AT1G20340.1      | -9.43   | 2.87E-08 | PLASTOCYANIN 2                            |
| ARR17   | Downregulated | AT4G39260.4      | -9.16   | 1.18E-04 | cold, circadian rhythm, and RNA binding 1 |
| ARR17   | Downregulated | AT5G52490.1      | -8.95   | 3.66E-09 | Fibrillarin family protein                |
| ARR17   | Downregulated | AT2G40610.1      | -8.78   | 2.14E-04 | Expansin A8                               |
| ARR17   | Downregulated | AT5G25450.2      | -8.73   | 4.62E-10 | Cytochrome bd ubiquinol oxidase           |
| ARR17   | Downregulated | AT2G19750.1      | -8.62   | 8.35E-05 | Ribosomal protein ES30Z                   |
| ARR17   | Downregulated | AT2G44490.1      | -8.55   | 5.42E-04 | PENETRATION 2                             |
| ARR17   | Downregulated | AT4G39200.1      | -8.48   | 2.79E-03 | Ribosomal protein ES25W                   |
| GATA15  | Upregulated   | AT1G27310.1      | 7.58    | 3.07E-08 | nuclear transport factor 2A               |
| GATA15  | Upregulated   | AT5G13450.2      | 7.47    | 1.03E-03 | delta subunit of Mt ATP synthase          |
| GATA15  | Upregulated   | AT3G51090.2      | 7.31    | 5.76E-08 | coiled-coil 90B-like protein              |
| GATA15  | Upregulated   | AT3G51090.1      | 7.30    | 9.81E-08 | coiled-coil 90B-like protein              |
| GATA15  | Upregulated   | AT5G13450.1      | 7.26    | 4.93E-04 | delta subunit of Mt ATP synthase          |
| GATA15  | Upregulated   | AT2G21160.2      | 7.09    | 2.74E-07 | Translocon-associated protein             |
| GATA15  | Upregulated   | AT1G55560.1      | 6.87    | 9.82E-05 | SKU5-Similar 14                           |
| GATA15  | Upregulated   | AT5G56369.1      | 6.85    | 3.25E-07 | no full name available                    |
| GATA15  | Upregulated   | AT3G13400.2      | 6.83    | 1.08E-04 | SKU5-Similar 13                           |

|                  |               |             |        |          |                                         |
|------------------|---------------|-------------|--------|----------|-----------------------------------------|
| GATA15           | Upregulated   | AT2G21160.1 | 6.79   | 4.93E-07 | Translocon-associated protein           |
| GATA15           | Downregulated | AT4G26800.1 | -11.59 | 2.27E-08 | Pentatricopeptide repeat protein        |
| GATA15           | Downregulated | AT4G26800.2 | -11.37 | 8.80E-09 | Pentatricopeptide repeat protein        |
| GATA15           | Downregulated | AT4G26800.3 | -10.60 | 2.60E-08 | Pentatricopeptide repeat protein        |
| GATA15           | Downregulated | AT4G32551.1 | -10.60 | 1.55E-08 | ROTUNDA 2, LEUNIG                       |
| GATA15           | Downregulated | AT4G32551.2 | -10.55 | 6.10E-09 | ROTUNDA 2, LEUNIG                       |
| GATA15           | Downregulated | AT5G40890.2 | -10.40 | 3.07E-08 | CHLORIDE CHANNEL-A                      |
| GATA15           | Downregulated | AT5G40890.1 | -10.36 | 6.10E-09 | CHLORIDE CHANNEL-A                      |
| GATA15           | Downregulated | AT1G72470.1 | -10.24 | 5.23E-08 | exocyst subunit exo70 family protein D1 |
| GATA15           | Downregulated | AT2G35490.1 | -10.06 | 2.40E-08 | FIBRILLIN2                              |
| GATA15           | Downregulated | AT1G55210.2 | -10.02 | 1.08E-08 | Disease resistance-responsive protein   |
| Sapur.15WG068800 | Upregulated   | AT2G40740.3 | 0.01   | 0        | WRKY DNA-binding protein 55             |
| Sapur.15WG068800 | Upregulated   | AT5G64260.1 | 0.00   | 1        | EXORDIUM like 2                         |
| Sapur.15WG068800 | Upregulated   | AT1G63110.1 | 0.01   | 0        | no full name available                  |
| Sapur.15WG068800 | Upregulated   | AT4G29260.1 | 0.03   | 0        | Vegetative Storage Protein 3            |
| Sapur.15WG068800 | Upregulated   | AT2G46780.2 | 0.00   | 0        | RNA-binding family protein              |
| Sapur.15WG068800 | Upregulated   | AT5G06260.3 | 0.01   | 0        | oxidation resistance 3                  |
| Sapur.15WG068800 | Upregulated   | AT3G17630.1 | 0.00   | 0        | cation/H <sup>+</sup> exchanger 19      |
| Sapur.15WG068800 | Upregulated   | AT1G12800.1 | 0.03   | 9.93E-01 | S1 domain-containing RBP                |
| Sapur.15WG068800 | Upregulated   | AT1G30620.6 | 0.01   | 0        | HIGH SUGAR RESPONSE8                    |
| Sapur.15WG068800 | Upregulated   | AT2G47400.1 | 0.00   | 0        | CP12 domain-containing protein 1        |
| Sapur.15WG068800 | Downregulated | AT5G03360.1 | -7.85  | 1.69E-04 | no full name available                  |
| Sapur.15WG068800 | Downregulated | AT4G19850.1 | -5.25  | 2.75E-02 | phloem protein 2-A2                     |
| Sapur.15WG068800 | Downregulated | AT5G15720.3 | -4.88  | 2.05E-06 | GDSL-motif lipase 7                     |
| Sapur.15WG068800 | Downregulated | AT1G59520.4 | -4.84  | 2.24E-02 | CW7                                     |
| Sapur.15WG068800 | Downregulated | AT4G26180.1 | -4.82  | 4.81E-02 | CoA Carrier 2                           |
| Sapur.15WG068800 | Downregulated | AT5G15720.2 | -4.73  | 2.51E-04 | GDSL-motif lipase 7                     |
| Sapur.15WG068800 | Downregulated | AT1G14560.2 | -4.71  | 4.54E-02 | CoA Carrier 1                           |
| Sapur.15WG068800 | Downregulated | AT3G11650.1 | -4.68  | 3.02E-02 | NDR1/HIN1-like 2                        |
| Sapur.15WG068800 | Downregulated | AT2G43420.1 | -4.65  | 2.98E-03 | reticulon 20                            |
| Sapur.15WG068800 | Downregulated | AT4G26180.2 | -4.64  | 4.39E-02 | CoA Carrier 2                           |
| DRB1             | Upregulated   | AT3G10050.1 | 7.92   | 7.91E-07 | L-O-methylthreonine resistant 1         |
| DRB1             | Upregulated   | AT2G26990.1 | 6.87   | 8.02E-04 | CONSTITUTIVE PHOTOMORPHOGENIC 12        |

|                  |               |             |       |          |                                               |
|------------------|---------------|-------------|-------|----------|-----------------------------------------------|
| DRB1             | Upregulated   | AT5G40610.1 | 5.83  | 5.13E-04 | Glycerol-3-phosphate dehydrogenase plastidic  |
| DRB1             | Upregulated   | AT3G57470.5 | 5.65  | 4.57E-06 | Insulinase family protein                     |
| DRB1             | Upregulated   | AT3G57470.1 | 5.56  | 4.44E-06 | Insulinase family protein                     |
| DRB1             | Upregulated   | AT2G46720.1 | 5.54  | 4.52E-05 | 3-ketoacyl-CoA synthase 13                    |
| DRB1             | Upregulated   | AT3G10280.1 | 5.50  | 4.65E-05 | 3-ketoacyl-CoA synthase 14                    |
| DRB1             | Upregulated   | AT3G15590.1 | 5.50  | 9.39E-04 | DWEORG1                                       |
| DRB1             | Upregulated   | AT4G29690.1 | 5.44  | 4.41E-04 | no full name available                        |
| DRB1             | Upregulated   | AT3G57470.6 | 5.35  | 8.23E-06 | Alkaline-phosphatase-like family protein      |
| DRB1             | Downregulated | AT3G29796.1 | -9.95 | 4.93E-07 | hypothetical protein                          |
| DRB1             | Downregulated | AT3G07920.1 | -6.78 | 7.91E-07 | Translation initiation factor IF2/IF5         |
| DRB1             | Downregulated | AT1G56050.1 | -6.40 | 8.57E-04 | GTP-binding like protein                      |
| DRB1             | Downregulated | AT1G79490.1 | -5.93 | 1.51E-02 | embryo defective 2217                         |
| DRB1             | Downregulated | AT3G09220.1 | -5.87 | 4.37E-02 | laccase 7                                     |
| DRB1             | Downregulated | AT1G35310.1 | -5.83 | 1.47E-02 | MLP-like protein 168                          |
| DRB1             | Downregulated | AT4G35560.2 | -5.82 | 4.67E-02 | DUO1-activated WD40 1, Tomosyn-like           |
| DRB1             | Downregulated | AT5G35090.1 | -5.77 | 1.49E-05 | hypothetical protein                          |
| DRB1             | Downregulated | AT3G28840.1 | -5.75 | 2.81E-03 | hypothetical protein DUF1216                  |
| DRB1             | Downregulated | AT3G20720.1 | -5.75 | 3.13E-06 | amino terminal region of chorein              |
| Sapur.15WG074900 | Upregulated   | AT5G56369.1 | 4.83  | 2.34E-02 | defensin-like family protein                  |
| Sapur.15WG074900 | Upregulated   | AT3G13400.2 | 4.34  | 2.60E-02 | SKU5-Similar 13                               |
| Sapur.15WG074900 | Upregulated   | AT1G55560.1 | 4.18  | 3.14E-02 | SKU5-Similar 14                               |
| Sapur.15WG074900 | Upregulated   | AT2G01818.2 | 3.85  | 2.99E-02 | PLATZ transcription factor                    |
| Sapur.15WG074900 | Upregulated   | AT2G01818.1 | 3.80  | 2.68E-02 | PLATZ transcription factor                    |
| Sapur.15WG074900 | Upregulated   | AT3G60880.1 | 3.78  | 3.97E-02 | dihydrodipicolinate synthase 1                |
| Sapur.15WG074900 | Upregulated   | AT4G00550.2 | 3.72  | 3.68E-02 | digalactosyl diacylglycerol deficient 2       |
| Sapur.15WG074900 | Upregulated   | AT3G14530.1 | 3.68  | 4.25E-02 | geranylgeranyl pyrophosphate synthase 6       |
| Sapur.15WG074900 | Upregulated   | AT3G45230.1 | 3.61  | 4.74E-02 | ARABINOXYLAN PECTIN ARABINOGALACTAN PROTEIN 1 |
| Sapur.15WG074900 | Upregulated   | AT2G35780.1 | 3.19  | 4.83E-02 | serine carboxypeptidase-like 26               |
| Sapur.15WG074900 | Downregulated | AT4G05180.1 | -9.53 | 1.52E-03 | photosystem II subunit Q-2                    |
| Sapur.15WG074900 | Downregulated | AT1G72470.1 | -9.07 | 1.81E-03 | exocyst subunit exo70 family protein D1       |
| Sapur.15WG074900 | Downregulated | AT4G39260.4 | -8.81 | 9.99E-04 | cold, circadian rhythm, and RNA binding 1     |
| Sapur.15WG074900 | Downregulated | AT2G42170.1 | -8.73 | 7.21E-04 | Actin family protein                          |
| Sapur.15WG074900 | Downregulated | AT4G13850.4 | -8.66 | 2.94E-04 | glycine-rich RNA-binding protein 2            |



|                 |               |             |       |          |                                                              |
|-----------------|---------------|-------------|-------|----------|--------------------------------------------------------------|
| Sapur.15WG07490 | Downregulated | AT4G21280.2 | -8.60 | 2.56E-03 | photosystem II subunit QA                                    |
| Sapur.15WG07490 | Downregulated | AT1G20440.1 | -8.38 | 1.83E-03 | cold-regulated 47                                            |
| Sapur.15WG07490 | Downregulated | AT4G12600.1 | -8.37 | 4.71E-04 | Ribosomal protein L7Ae/L30e/S12e/Gadd45 family protein       |
| Sapur.15WG07490 | Downregulated | AT4G35560.1 | -8.36 | 1.40E-03 | DUO1-activated WD40 1, Tomosyn-like                          |
| Sapur.15WG07490 | Downregulated | AT1G19870.2 | -8.30 | 2.32E-03 | IQ-domain 32                                                 |
| Sapur.15WG07570 | Upregulated   | AT1G35550.1 | 7.24  | 2.32E-04 | elongation factor Tu                                         |
| Sapur.15WG07570 | Upregulated   | AT1G26230.4 | 6.82  | 1.60E-03 | chaperonin-60beta4                                           |
| Sapur.15WG07570 | Upregulated   | AT1G68650.1 | 6.60  | 6.20E-03 | photosynthesis-affected mutant 71 like 5                     |
| Sapur.15WG07570 | Upregulated   | AT2G36910.1 | 6.48  | 2.05E-04 | ATP-binding cassette B1                                      |
| Sapur.15WG07570 | Upregulated   | AT1G26230.5 | 6.45  | 1.35E-03 | chaperonin-60beta4                                           |
| Sapur.15WG07570 | Upregulated   | AT1G26230.2 | 6.18  | 1.35E-03 | chaperonin-60beta4                                           |
| Sapur.15WG07570 | Upregulated   | AT1G25520.1 | 6.12  | 1.07E-02 | photosynthesis-affected mutant 71 like 4                     |
| Sapur.15WG07570 | Upregulated   | AT1G62570.1 | 6.04  | 1.35E-03 | flavin-monooxygenase glucosinolate S-oxygenase 4             |
| Sapur.15WG07570 | Upregulated   | AT1G26230.3 | 5.98  | 1.24E-03 | chaperonin-60beta4                                           |
| Sapur.15WG07570 | Upregulated   | AT1G26230.1 | 5.89  | 1.24E-03 | chaperonin-60beta4                                           |
| Sapur.15WG07570 | Downregulated | AT2G47960.1 | -7.28 | 4.95E-03 | TRAPPC13                                                     |
| Sapur.15WG07570 | Downregulated | AT5G54730.2 | -6.47 | 1.59E-03 | homolog of yeast autophagy 18 (ATG18) F                      |
| Sapur.15WG07570 | Downregulated | AT5G53060.1 | -6.34 | 2.78E-05 | Enhanced Stress Response 1                                   |
| Sapur.15WG07570 | Downregulated | ATCG00650.1 | -6.32 | 4.50E-03 | ribosomal protein S18                                        |
| Sapur.15WG07570 | Downregulated | AT1G65470.1 | -5.95 | 1.81E-03 | FASCIATA 1                                                   |
| Sapur.15WG07570 | Downregulated | AT1G65470.2 | -5.84 | 2.10E-03 | FASCIATA 1                                                   |
| Sapur.15WG07570 | Downregulated | AT1G27045.5 | -5.67 | 3.47E-02 | homeobox protein 54                                          |
| Sapur.15WG07570 | Downregulated | AT1G27045.4 | -5.64 | 3.29E-02 | homeobox protein 54                                          |
| Sapur.15WG07570 | Downregulated | AT1G74330.2 | -5.63 | 2.88E-03 | Protein kinase superfamily protein                           |
| Sapur.15WG07570 | Downregulated | AT1G74330.3 | -5.54 | 4.25E-03 | Protein kinase superfamily protein                           |
| LEAFY           | Upregulated   | AT5G17050.1 | 9.23  | 2.51E-05 | UDP-glucosyl transferase 78D2                                |
| LEAFY           | Upregulated   | AT5G07600.1 | 8.61  | 2.45E-08 | Oleosin family protein                                       |
| LEAFY           | Upregulated   | AT1G35310.1 | 7.96  | 2.87E-05 | MLP-like protein 168                                         |
| LEAFY           | Upregulated   | AT1G68650.1 | 7.83  | 2.47E-03 | photosynthesis-affected mutant 71 like 5                     |
| LEAFY           | Upregulated   | AT1G25520.1 | 7.61  | 1.93E-03 | photosynthesis-affected mutant 71 like 4                     |
| LEAFY           | Upregulated   | AT5G13410.2 | 6.94  | 1.03E-05 | FKBP-like peptidyl-prolyl cis-trans isomerase family protein |
| LEAFY           | Upregulated   | AT2G03550.1 | 6.87  | 4.45E-06 | alpha/beta-Hydrolases superfamily protein                    |
| LEAFY           | Upregulated   | AT5G13410.3 | 6.57  | 8.27E-06 | FKBP-like peptidyl-prolyl cis-trans isomerase family protein |

|       |               |             |       |          |                                                             |
|-------|---------------|-------------|-------|----------|-------------------------------------------------------------|
| LEAFY | Upregulated   | AT1G78670.1 | 6.28  | 1.03E-05 | gamma-glutamyl hydrolase 3                                  |
| LEAFY | Upregulated   | AT5G65460.2 | 6.25  | 5.41E-04 | kinesin like protein for actin based chloroplast movement 2 |
| LEAFY | Downregulated | AT5G56369.1 | -9.62 | 4.78E-08 | defensin-like family protein                                |
| LEAFY | Downregulated | AT3G29796.1 | -9.60 | 1.01E-07 | hypothetical protein                                        |
| LEAFY | Downregulated | AT1G56050.1 | -7.69 | 1.01E-07 | ENGD-2                                                      |
| LEAFY | Downregulated | AT4G31720.2 | -7.03 | 4.45E-06 | SALT TOLERANCE DURING GERMINATION 1                         |
| LEAFY | Downregulated | AT4G22150.1 | -5.95 | 1.14E-03 | plant UBX domain-containing protein 3                       |
| LEAFY | Downregulated | AT4G10090.1 | -5.50 | 4.76E-03 | elongator protein 6                                         |
| LEAFY | Downregulated | AT4G04210.1 | -5.09 | 7.80E-03 | plant UBX domain containing protein 4                       |
| LEAFY | Downregulated | AT1G65650.1 | -4.96 | 8.92E-03 | ENGD-2                                                      |
| LEAFY | Downregulated | AT5G53060.1 | -4.86 | 2.62E-02 | Enhanced Stress Response 1                                  |
| LEAFY | Downregulated | AT4G03110.2 | -4.73 | 1.14E-03 | Bruno-like 1, RNA-binding protein-defense related 1         |
| FT    | Upregulated   | AT5G55310.1 | 7.01  | 6.00E-05 | TOPOISOMERASE 1, DNA topoisomerase 1 beta                   |
| FT    | Upregulated   | AT3G03430.1 | 5.96  | 3.13E-04 | EF-hand family protein                                      |
| FT    | Upregulated   | AT5G17000.1 | 4.93  | 2.17E-02 | Zinc-binding dehydrogenase family protein                   |
| FT    | Upregulated   | AT3G52090.2 | 4.82  | 5.31E-04 | NRPB11                                                      |
| FT    | Upregulated   | AT5G49680.2 | 4.70  | 7.78E-03 | similar to SABRE                                            |
| FT    | Upregulated   | AT5G16990.1 | 4.69  | 9.36E-03 | hypothetical protein                                        |
| FT    | Upregulated   | AT5G55300.1 | 4.67  | 2.10E-05 | FASCIATA5                                                   |
| FT    | Upregulated   | AT5G55300.2 | 4.67  | 2.10E-05 | FASCIATA5                                                   |
| FT    | Upregulated   | AT2G35740.1 | 4.64  | 2.53E-02 | inositol transporter 3                                      |
| FT    | Upregulated   | AT5G55300.3 | 4.57  | 6.31E-04 | FASCIATA5                                                   |
| FT    | Downregulated | AT3G53500.1 | -5.90 | 6.40E-04 | arginine/serine-rich zinc knuckle-containing protein 32     |
| FT    | Downregulated | AT1G60730.2 | -5.73 | 1.10E-04 | NAD(P)-linked oxidoreductase superfamily protein            |
| FT    | Downregulated | AT1G10810.2 | -5.70 | 1.25E-04 | NAD(P)-linked oxidoreductase superfamily protein            |
| FT    | Downregulated | AT3G53500.2 | -5.36 | 5.31E-04 | arginine/serine-rich zinc knuckle-containing protein 32     |
| FT    | Downregulated | AT3G09040.1 | -5.29 | 3.22E-02 | mitochondrial RNA editing factor 12                         |
| FT    | Downregulated | AT2G45770.1 | -5.11 | 1.36E-05 | FERRIC CHELATE REDUCTASE DEFECTIVE 4                        |
| FT    | Downregulated | AT4G30310.4 | -4.64 | 6.00E-05 | FGGY family of carbohydrate kinase                          |
| FT    | Downregulated | AT1G01780.1 | -4.63 | 1.06E-02 | PLIM2b                                                      |
| FT    | Downregulated | AT1G74740.1 | -4.62 | 4.21E-03 | calcium-dependent protein kinase 30                         |
| FT    | Downregulated | AT5G49500.2 | -4.57 | 8.34E-04 | Signal recognition particle SRP54 subunit protein           |

609  
610  
611  
612  
613  
614

**Table S2.** Sex dimorphism related genes involved in floral development and secondary metabolism adjacent to significant peaks in DAP-Seq analysis.

| Library      | Description                         | Target Gene      | Description                                                                             | Fold-change |
|--------------|-------------------------------------|------------------|-----------------------------------------------------------------------------------------|-------------|
| 94006        | <i>AP2/ERF</i> Transcription Factor | Sapur.003G127200 | AGL69,FCL4,MAF4, MADS-box transcription factor, flowering time                          | 5.05        |
|              | <i>AP2/ERF</i> Transcription Factor | Sapur.008G077600 | AGL4,SEP2, MADS-box transcription factor, ovule development                             | 4.96        |
|              | <i>AP2/ERF</i> Transcription Factor | Sapur.009G065900 | AGL62, MADS-box transcription factor, endosperm development                             | 4.61        |
|              | <i>AP2/ERF</i> Transcription Factor | Sapur.013G069000 | WUSCHEL related homeobox 11                                                             | 5.88        |
|              | <i>AP2/ERF</i> Transcription Factor | Sapur.014G055900 | AGL6, MADS-box transcription factor, floral organ development                           | 3.34        |
| 'Fish Creek' | <i>AP2/ERF</i> Transcription Factor | SpFC.15G019600   | cytokinin response factor 4                                                             | 6.29        |
|              | <i>AP2/ERF</i> Transcription Factor | SpFC.13G066100   | WUSCHEL related homeobox 11                                                             | 4.35        |
| 94006        | Homeodomain-like protein            | Sapur.007G105000 | beta-ocimene synthase                                                                   | 6.65        |
|              | Homeodomain-like protein            | Sapur.019G014800 | terpene synthase 21                                                                     | 5.94        |
|              | Homeodomain-like protein            | Sapur.019G014700 | terpene synthase 21                                                                     | 5.52        |
|              | Homeodomain-like protein            | Sapur.004G024600 | geranyl linalool synthase                                                               | 4.91        |
|              | Homeodomain-like protein            | Sapur.019G015500 | beta-pinene synthase                                                                    | 3.99        |
|              | Homeodomain-like protein            | Sapur.016G185200 | pinene synthase                                                                         | 4.15        |
|              | Homeodomain-like protein            | Sapur.011G018900 | alpha-farnesene synthase                                                                | 3.52        |
|              | Homeodomain-like protein            | Sapur.016G013600 | UDP-glucose flavonoid 3-O-glucosyltransferase                                           | 3.69        |
|              | Homeodomain-like protein            | Sapur.011G018900 | alpha-farnesene synthase                                                                | 3.30        |
|              | Homeodomain-like protein            | Sapur.019G014700 | terpene synthase 21                                                                     | 3.29        |
|              | Homeodomain-like protein            | Sapur.012G102300 | AGL42, MADS-box transcription factor                                                    | 6.25        |
|              | Homeodomain-like protein            | Sapur.004G074100 | AGL8,FUL, MADS-box transcription factor                                                 | 5.31        |
|              | Homeodomain-like protein            | Sapur.016G063100 | AGL48, MADS-box transcription factor                                                    | 5.45        |
|              | Homeodomain-like protein            | Sapur.007G068100 | ABS,AGL32,TT16, MADS-box transcription factor, necessary for ovule endothelial identity | 5.63        |
|              | Homeodomain-like protein            | Sapur.013G018400 | AGL80,FEM111, MADS-box transcription factor                                             | 5.50        |
|              | Homeodomain-like protein            | Sapur.012G022600 | UDP-sugar flavonoid 7-O-glycosyltransferase                                             | 5.57        |
|              | Homeodomain-like protein            | Sapur.007G047700 | AGL104, MADS-box transcription factor, pollen tube development and growth               | 4.83        |
|              | Homeodomain-like protein            | Sapur.012G045200 | AGL8,FUL, MADS-box transcription factor                                                 | 4.49        |
|              | Homeodomain-like protein            | Sapur.004G074100 | AGL8,FUL, MADS-box transcription factor                                                 | 4.18        |
|              | Homeodomain-like protein            | Sapur.004G074000 | AGL4,SEP2, MADS-box transcription factor, ovule development                             | 3.86        |
|              | Homeodomain-like protein            | Sapur.013G001400 | AGL80,FEM111, MADS-box transcription factor                                             | 4.40        |
|              | Homeodomain-like protein            | Sapur.013G127700 | UDP-glucose:flavonoid 3-O-glucosyltransferase                                           | 4.29        |
|              | Homeodomain-like protein            | Sapur.006G043300 | UDP-glucose:flavonoid 7-O-glucosyltransferase                                           | 3.30        |

|                          |                          |                                                                                         |                                                                                         |      |
|--------------------------|--------------------------|-----------------------------------------------------------------------------------------|-----------------------------------------------------------------------------------------|------|
| Homeodomain-like protein | Sapur.002G123800         | AGL20,ATSOC1,SOC1, MADS-box transcription factor, flowering time                        | 4.09                                                                                    |      |
| Homeodomain-like protein | Sapur.016G014300         | UDP-glucose flavonoid 3-O-glucosyltransferase                                           | 4.41                                                                                    |      |
| Homeodomain-like protein | Sapur.003G126600         | AGL10,CAL,CAL1, MADS-box transcription factor                                           | 3.16                                                                                    |      |
| Homeodomain-like protein | Sapur.019G074900         | AGL11,STK, MADS-box transcription factor, carpel expressed, seed development            | 4.07                                                                                    |      |
| Homeodomain-like protein | Sapur.019G074500         | AGL12,XAL1, MADS-box transcription factor, flowering time                               | 3.79                                                                                    |      |
| Homeodomain-like protein | Sapur.008G114500         | TAPETUM 1                                                                               | 3.29                                                                                    |      |
| Homeodomain-like protein | Sapur.016G203100         | AGL8,FUL, MADS-box transcription factor                                                 | 3.15                                                                                    |      |
| Homeodomain-like protein | Sapur.008G083600         | TPD1, tapetum determinant 1, anther and pollen development                              | 3.18                                                                                    |      |
| Homeodomain-like protein | Sapur.007G014400         | AP3,ATAP3, MADS-box transcription factor, specifies stamen identity                     | 4.73                                                                                    |      |
| Homeodomain-like protein | Sapur.011G052400         | AG, MADS-box transcription factor, specifies carpel and stamen identity                 | 4.86                                                                                    |      |
| Homeodomain-like protein | Sapur.004G044800         | AG, MADS-box transcription factor, specifies carpel and stamen identity                 | 4.04                                                                                    |      |
| Homeodomain-like protein | Sapur.005G094500         | AP3,ATAP3, MADS-box transcription factor, specifies stamen identity                     | 3.03                                                                                    |      |
| Homeodomain-like protein | Sapur.003G126500         | AGL10,CAL,CAL1, MADS-box transcription factor                                           | 3.10                                                                                    |      |
| Homeodomain-like protein | SpFC.13G018400           | AGL80,FEM111, MADS-box transcription factor                                             | 7.96                                                                                    |      |
| Homeodomain-like protein | SpFC.07G049600           | AGL104, MADS-box transcription factor, pollen tube development and growth               | 6.48                                                                                    |      |
| Homeodomain-like protein | SpFC.03G127900           | AGL9,SEP3, MADS-box transcription factor, stamen development                            | 6.47                                                                                    |      |
| Homeodomain-like protein | SpFC.07G110800           | AGL66, MADS-box transcription factor, pollen tube development and growth                | 6.20                                                                                    |      |
| Homeodomain-like protein | SpFC.12G109600           | AGL42, MADS-box transcription factor                                                    | 6.10                                                                                    |      |
| Homeodomain-like protein | SpFC.11G052600           | AG, MADS-box transcription factor, specifies carpel and stamen identity                 | 5.52                                                                                    |      |
| Homeodomain-like protein | SpFC.07G069400           | ABS,AGL32,TT16, MADS-box transcription factor, necessary for ovule endothelial identity | 5.36                                                                                    |      |
| Homeodomain-like protein | SpFC.19G078600           | AGL11,STK, MADS-box transcription factor, carpel expressed, seed development            | 4.99                                                                                    |      |
| Homeodomain-like protein | SpFC.12G046800           | AGL8,FUL, MADS-box transcription factor                                                 | 4.84                                                                                    |      |
| Homeodomain-like protein | SpFC.04G045900           | AG, MADS-box transcription factor, specifies carpel and stamen identity                 | 4.83                                                                                    |      |
| Homeodomain-like protein | SpFC.03G128100           | AGL10,CAL,CAL1, MADS-box transcription factor                                           | 4.69                                                                                    |      |
| Homeodomain-like protein | SpFC.13G001700           | AGL80,FEM111, MADS-box transcription factor                                             | 4.68                                                                                    |      |
| Homeodomain-like protein | SpFC.13G001800           | AGL80,FEM111, MADS-box transcription factor                                             | 4.53                                                                                    |      |
| 'Fish Creek'             | Homeodomain-like protein | SpFC.02G131600                                                                          | AGL20,ATSOC1,SOC1, MADS-box transcription factor, flowering time                        | 4.44 |
|                          | Homeodomain-like protein | SpFC.16G214600                                                                          | AGL8,FUL, MADS-box transcription factor                                                 | 4.41 |
|                          | Homeodomain-like protein | SpFC.08G086200                                                                          | AGL4,SEP2, MADS-box transcription factor, ovule development                             | 4.34 |
|                          | Homeodomain-like protein | SpFC.04G076000                                                                          | AGL8,FUL, MADS-box transcription factor                                                 | 4.06 |
|                          | Homeodomain-like protein | SpFC.05G076600                                                                          | ABS,AGL32,TT16, MADS-box transcription factor, necessary for ovule endothelial identity | 3.78 |
|                          | Homeodomain-like protein | SpFC.04G075900                                                                          | AGL4,SEP2, MADS-box transcription factor, ovule development                             | 3.71 |
|                          | Homeodomain-like protein | SpFC.12G083700                                                                          | AGL10,CAL,CAL1, MADS-box transcription factor                                           | 3.58 |
|                          | Homeodomain-like protein | SpFC.16G214600                                                                          | AGL8,FUL, MADS-box transcription factor                                                 | 3.38 |
|                          | Homeodomain-like protein | SpFC.04G099300                                                                          | AGL29, MADS-box transcription factor                                                    | 3.19 |
|                          | Homeodomain-like protein | SpFC.19G078200                                                                          | AGL12,XAL1, MADS-box transcription factor, flowering time                               | 3.13 |
|                          | Homeodomain-like protein | SpFC.15G019600                                                                          | cytokinin response factor 4                                                             | 6.25 |
|                          | Homeodomain-like protein | SpFC.13G147000                                                                          | cytokinin response factor 4                                                             | 5.70 |
|                          | Homeodomain-like protein | SpFC.01G079600                                                                          | cytokinin response factor 2                                                             | 4.59 |
|                          | Homeodomain-like protein | SpFC.02G156100                                                                          | cytokinin response factor 5                                                             | 3.23 |

|              |                              |                  |                                                                                            |      |
|--------------|------------------------------|------------------|--------------------------------------------------------------------------------------------|------|
|              | Homeodomain-like protein     | SpFC.16G119100   | AGL82, MADS-box transcription factor                                                       | 4.74 |
| 'Fish Creek' | <i>scarecrow</i> -like 18    | SpFC.10G054800   | RAB geranylgeranyl transferase alpha subunit 1                                             | 3.40 |
| 94006        | GATA transcription factor 15 | Sapur.012G027300 | AT1G75560.1 homolog, zinc knuckle (CCHC-type), regulation of reproductive development      | 5.36 |
|              | GATA transcription factor 15 | Sapur.006G190400 | ATH1 transcription factor activated by AGAMOUS, regulates GA biosynthesis, flowering delay | 5.10 |

## 615 Supplemental Datasets

616 **Supplemental Dataset S1.** Plasmid map (.dna format) for *ARR17* Sapur.15WG073500 expression plasmid  
617 (pBH100)

618 **Supplemental Dataset S2.** Plasmid map (.dna format) for *GATA15* Sapur.15WG062800 expression  
619 plasmid (pBH101)

620 **Supplemental Dataset S3.** Plasmid map (.dna format) for CCHC Zinc Finger Sapur.15WG068800  
621 expression plasmid (pBH102)

622 **Supplemental Dataset S4.** Plasmid map (.dna format) for *DRB1* Sapur.15WG074300 expression plasmid  
623 (pBH103)

624 **Supplemental Dataset S5.** Plasmid map (.dna format) for hypothetical protein Sapur.15WG074900  
625 expression plasmid (pBH104)

626 **Supplemental Dataset S6.** Plasmid map (.dna format) for hypothetical protein Sapur.15WG075700  
627 expression plasmid (pBH106)

628 **Supplemental Dataset S7.** Plasmid map (.dna format) for *LEAFY* Sapur.15WG122200 expression plasmid  
629 (pBH107)

630 **Supplemental Dataset S8.** Plasmid map (.dna format) for *FT* Sapur.008G061900 expression plasmid  
631 (pBH108)

632 **Supplemental Dataset S9.** Plasmid map (.dna format) for pIX-HALO expression vector with  
633 Sapur.15WG062800 (pBH217)

634 **Supplemental Dataset S10.** Plasmid map (.dna format) for pIX-HALO expression vector with  
635 Sapur.15WG068800 (pBH218)

636 **Supplemental Dataset S11.** Plasmid map (.dna format) for pIX-HALO expression vector with  
637 Sapur.012G009500 (pBH219)

638 **Supplemental Dataset S12.** Plasmid map (.dna format) for pIX-HALO expression vector with  
639 Sapur.006G140600 (pBH220)

640 **Supplemental Dataset S13.** Plasmid map (.dna format) for pIX-HALO expression vector with  
641 Sapur.007G074000 (pBH225)

642 **Supplemental Dataset S14.** Plasmid map (.dna format) for pIX-HALO expression vector with  
643 Sapur.005G077400 (pBH226)

644 **Supplemental Dataset S15.** Plasmid map (.dna format) for pIX-HALO expression vector with  
645 Sapur.003G155500 (pBH227)

- 646 **Supplemental Dataset S16.** Plasmid map (.dna format) for pIX-HALO expression vector with  
647 Sapur.004G110200 (pBH228)
- 648 **Supplemental Dataset S17.** Plasmid map (.dna format) for pIX-HALO expression vector with  
649 Sapur.017G014200 (pBH229)
- 650 **Supplemental Dataset S18.** Plasmid map (.dna format) for pIX-HALO expression vector with  
651 Sapur.001G003600 (pBH232)
- 652 **Supplemental Dataset S19.** Plasmid map (.dna format) for pIX-HALO expression vector with  
653 Sapur.003G027300 (pBH242)
- 654 **Supplemental Dataset S20.** Expression data on all significant differentially abundant proteins for  
655 Arabidopsis expression lines 100 to 108.
- 656 **Supplemental Dataset S21.** Listing of all significant target genes for each DAP-Seq assay.

657

## 658 Bibliography

- 659 **Acevedo FG, Gamboa A, Paéz-Valencia J, Jiménez-García LF, Izaguirre-Sierra M, Alvarez-Buylla ER**  
660 (2004) FLOR1, a putative interaction partner of the floral homeotic protein AGAMOUS, is a  
661 plant-specific intracellular LRR. *Plant Sci.* **167**: 225-231
- 662 **Akagi T, Pilkington SM, Varkonyi-Gasic E, Henry IM, Sugano SS, Sonoda M, Firl A, McNeilage MA,**  
663 **Douglas MJ, Wang T, Rebstock R, Voogd C, Datson P, Allan AC, Beppu K, Kataoka I, Tao R**  
664 (2019) Two Y-chromosome-encoded genes determine sex in kiwifruit. *Nature Plants* **5**: 801-809
- 665 **Albert E, Kawai-Ool U, Ezhova T** (2015) Studying the role of *FASCIATA5* gene in the regulation of flower  
666 development in *Arabidopsis thaliana*. *Russ. J. Dev. B.* **46**: 19-26
- 667 **Argus GW** (1997) Infrageneric classification of *Salix* (Salicaceae) in the new world. *Syst. Bot. Monog.* **52**:  
668 1-121
- 669 **Bailey TL, Elkan C** (1994) Fitting a mixture model by expectation maximization to discover motifs in  
670 bipolymers. UCSD Technical Report: CS94-351.
- 671 **Batth TS, Tollenaere MX, Rütther P, Gonzalez-Franquesa A, Prabhakar BS, Bekker-Jensen S, Deshmukh**  
672 **AS, Olsen JV** (2019) Protein aggregation capture on microparticles enables multipurpose  
673 proteomics sample preparation. *Mol. Cell Proteomics* **18**: 1027-1035
- 674 **Baumgart LA, Lee JE, Salamov A, Dilworth DJ, Na H, Mingay M, Blow MJ, Zhang Y, Yoshinaga Y, Daum**  
675 **CG** (2021) Persistence and plasticity in bacterial gene regulation. *Nat. Methods* **18**: 1499-1505
- 676 **Blighe K, Rana S, Lewis M** (2018) EnhancedVolcano: Publication-ready volcano plots with enhanced  
677 colouring and labeling, Github.
- 678 **Carlson CH, Choi Y, Chan AP, Serapiglia MJ, Town CD, Smart LB** (2017) Dominance and sexual  
679 dimorphism pervade the *Salix purpurea* L. transcriptome. *Genome Biol. Evol.* **9**: 2377-2394
- 680 **Charlesworth D** (2002) Plant sex determination and sex chromosomes. *Heredity* **88**: 94-101
- 681 **Cronk Q, Müller NA** (2020) Default sex and single gene sex determination in dioecious plants. *Front.*  
682 *Plant Sci.* **11**: 1162
- 683 **De Folter S, Shchennikova AV, Franken J, Busscher M, Baskar R, Grossniklaus U, Angenent GC, Immink**  
684 **RG** (2006) A Bsister MADS-box gene involved in ovule and seed development in petunia and  
685 *Arabidopsis*. *Plant J.* **47**: 934-946

- 686 **Dorca-Fornell C, Gregis V, Grandi V, Coupland G, Colombo L, Kater MM** (2011) The Arabidopsis *SOC1*-  
687 like genes *AGL42*, *AGL71* and *AGL72* promote flowering in the shoot apical and axillary  
688 meristems. *Plant J.* **67**: 1006-1017
- 689 **Eng JK, McCormack AL, Yates JR** (1994) An approach to correlate tandem mass spectral data of peptides  
690 with amino acid sequences in a protein database. *J. Am. Soc. Mass Spectrom.* **5**: 976-989
- 691 **Gómez-Mena C, de Folter S, Costa MMR, Angenent GC, Sablowski R** (2005) Transcriptional program  
692 controlled by the floral homeotic gene *AGAMOUS* during early organogenesis. *Development*  
693 **132**: 429-438
- 694 **Goodstein DM, Shu S, Howson R, Neupane R, Hayes RD, Fazo J, Mitros T, Dirks W, Hellsten U, Putnam  
695 N, Rokhsar DS** (2011) Phytozome: a comparative platform for green plant genomics. *Nucleic  
696 Acids Res.* **40**: D1178-D1186
- 697 **Harkess A, Huang K, van der Hulst R, Tissen B, Caplan JL, Koppula A, Batish M, Meyers BC, Leebens-  
698 Mack J** (2020) Sex determination by two Y-Linked genes in garden asparagus. *Plant Cell* **32**:  
699 1790-1796
- 700 **Hu L, Zheng T, Cai M, Pan H, Wang J, Zhang Q** (2019) Transcriptome analysis during floral organ  
701 development provides insights into stamen petaloidy in *Lagerstroemia speciosa*. *Plant Physiol.  
702 Biochem.* **142**: 510-518
- 703 **Hyden B, Carlson CH, Gouker FE, Schmutz J, Barry K, Lipzen A, Sharma A, Sandor L, Tuskan GA, Feng G,  
704 Olson MS, DiFazio SP, Smart LB** (2021) Integrative genomics reveals paths to sex dimorphism in  
705 *Salix purpurea* L. *Hort. Res.* **8**: 170
- 706 **Hyden B, Zou J, Wilkerson DG, Carlson CH, Rivera Robles A, DiFazio SP, Smart LB** (2023) Structural  
707 variation of a sex-linked region confers monoecy and implicates *GATA15* as a master regulator  
708 of sex in *Salix purpurea*. *New Phytol.* DOI 10.1111/nph.18853
- 709 **Jing D, Chen W, Hu R, Zhang Y, Xia Y, Wang S, He Q, Guo Q, Liang G** (2020) An integrative analysis of  
710 transcriptome, proteome and hormones reveals key differentially expressed genes and  
711 metabolic pathways involved in flower development in loquat. *Int. J. of Mol. Sci.* **21**: 5107
- 712 **Käfer J, Marais GAB, Pannell JR** (2017) On the rarity of dioecy in flowering plants. *Mol. Ecol.* **26**: 1225-  
713 1241
- 714 **Käll L, Canterbury JD, Weston J, Noble WS, MacCoss MJ** (2007) Semi-supervised learning for peptide  
715 identification from shotgun proteomics datasets. *Nat. Methods* **4**: 923-925
- 716 **Kardailsky I, Shukla VK, Ahn JH, Dagenais N, Christensen SK, Nguyen JT, Chory J, Harrison MJ, Weigel D**  
717 (1999) Activation tagging of the floral inducer FT. *Science* **286**: 1962-1965
- 718 **Keefover-Ring K, Carlson CH, Hyden B, Azeem M, Smart LB** (2022) Genetic mapping of sexually  
719 dimorphic volatile and non-volatile floral secondary chemistry of a dioecious willow. *J. Exp. Bot.*  
720 **73**: 6352-6366
- 721 **Krizek BA, Meyerowitz EM** (1996) The Arabidopsis homeotic genes *APETALA3* and *PISTILLATA* are  
722 sufficient to provide the B class organ identity function. *Development* **122**: 11-22
- 723 **Kuzovkina YA, Weih M, Romero MA, Charles J, Hust S, McIvor I, Karp A, Trybush S, Labrecque M,  
724 Teodorescu TI** (2007) *Salix*: botany and global horticulture. *Hortic. Rev.* **34**: 447-489
- 725 **Lamesch P, Berardini TZ, Li D, Swarbreck D, Wilks C, Sasidharan R, Muller R, Dreher K, Alexander DL,  
726 Garcia-Hernandez M** (2012) The Arabidopsis Information Resource (TAIR): improved gene  
727 annotation and new tools. *Nucleic Acids Res.* **40**: D1202-D1210
- 728 **Larsson A** (2014) AliView: a fast and lightweight alignment viewer and editor for large datasets.  
729 *Bioinformatics* **30**: 3276-3278
- 730 **Liljegrén SJ, Ditta GS, Eshed Y, Savidge B, Bowman JL, Yanofsky MF** (2000) *SHATTERPROOF* MADS-box  
731 genes control seed dispersal in Arabidopsis. *Nature* **404**: 766-770

- 732 **Liu W, Xu L, Lin H, Cao J** (2021) Two expansin genes, *AtEXPA4* and *AtEXPB5*, are redundantly required  
733 for pollen tube growth and *AtEXPA4* is involved in primary root elongation in *Arabidopsis*  
734 *thaliana*. *Genes* **12**: 249
- 735 **Liu Z, Meyerowitz EM** (1995) *LEUNIG* regulates *AGAMOUS* expression in *Arabidopsis* flowers.  
736 *Development* **121**: 975-991
- 737 **Lu J, Fu Y, Li M, Wang S, Wang J, Yang Q, Ye J, Zhang X, Ma H, Chang F** (2020) Global quantitative  
738 proteomics studies revealed tissue-preferential expression and phosphorylation of regulatory  
739 proteins in *Arabidopsis*. *Int. J. Mol. Sci.* **21**: 6116
- 740 **Mizukami Y, Ma H** (1992) Ectopic expression of the floral homeotic gene *AGAMOUS* in transgenic  
741 *Arabidopsis* plants alters floral organ identity. *Cell* **71**: 119-131
- 742 **Muller NA, Kersten B, Leite Montalvao AP, Mahler N, Bernhardsson C, Brautigam K, Carracedo Lorenzo**  
743 **Z, Hoenicka H, Kumar V, Mader M, Pakull B, Robinson KM, Sabatti M, Vettori C, Ingvarsson PK,**  
744 **Cronk Q, Street NR, Fladung M** (2020) A single gene underlies the dynamic evolution of poplar  
745 sex determination. *Nat. Plants* **6**: 630-637
- 746 **O'Malley RC, Huang SC, Song L, Lewsey MG, Bartlett A, Nery JR, Galli M, Gallavotti A, Ecker JR** (2016)  
747 Cistrome and epicistrome features shape the regulatory DNA landscape. *Cell* **165**: 1280-1292
- 748 **Orsburn BC** (2021) Proteome Discoverer—A community enhanced data processing suite for protein  
749 informatics. *Proteomes* **9**: 15
- 750 **Pucholt P, Ronnberg-Wastljung AC, Berlin S** (2015) Single locus sex determination and female  
751 heterogamy in the basket willow (*Salix viminalis* L.). *Heredity* **114**: 575-583
- 752 **Ranftl QL, Bastakis E, Klermund C, Schwechheimer C** (2016) LLM-domain containing B-GATA factors  
753 control different aspects of cytokinin-regulated development in *Arabidopsis thaliana*. *Plant*  
754 *Physiol.* **170**: 2295-2311
- 755 **Ritchie ME, Phipson B, Wu D, Hu Y, Law CW, Shi W, Smyth GK** (2015) limma powers differential  
756 expression analyses for RNA-sequencing and microarray studies. *Nucleic Acids Res.* **43**: e47-e47
- 757 **Rounsley SD, Ditta GS, Yanofsky MF** (1995) Diverse roles for MADS box genes in *Arabidopsis*  
758 development. *The Plant Cell* **7**: 1259-1269
- 759 **Sanderson BJ, Feng G, Hu N, Carlson CH, Smart LB, Keefover-Ring K, Yin T, Ma T, Liu J, DiFazio SP** (2021)  
760 Sex determination through X–Y heterogamy in *Salix nigra*. *Heredity* **126**: 630-639
- 761 **Schwacke R, Ponce-Soto GY, Krause K, Bolger AM, Arsova B, Hallab A, Gruden K, Stitt M, Bolger ME,**  
762 **Usadel B** (2019) MapMan4: a refined protein classification and annotation framework applicable  
763 to multi-omics data analysis. *Mol. Plant* **12**: 879-892
- 764 **Tuskan GA, DiFazio S, Jansson S, Bohlmann J, Grigoriev I, Hellsten U, Putnam N, Ralph S, Rombauts S,**  
765 **Salamov A, Schein J, Sterck L, Aerts A, Bhalerao RR, Bhalerao RP, Blaudez D, Boerjan W, Brun**  
766 **A, Brunner A, Busov V, Campbell M, Carlson J, Chalot M, Chapman J, Chen G-L, Cooper D,**  
767 **Coutinho PM, Couturier J, Covert S, Cronk Q, Cunningham R, Davis J, Degroeve S, Déjardin A,**  
768 **dePamphilis C, Detter J, Dirks B, Dubchak I, Duplessis S, Ehrling J, Ellis B, Gendler K, Goodstein**  
769 **D, Gribskov M, Grimwood J, Groover A, Gunter L, Hamberger B, Heinze B, Helariutta Y,**  
770 **Henrissat B, Holligan D, Holt R, Huang W, Islam-Faridi N, Jones S, Jones-Rhoades M, Jorgensen**  
771 **R, Joshi C, Kangasjärvi J, Karlsson J, Kelleher C, Kirkpatrick R, Kirst M, Kohler A, Kalluri U,**  
772 **Larimer F, Leebens-Mack J, Leplé J-C, Locascio P, Lou Y, Lucas S, Martin F, Montanini B, Napoli**  
773 **C, Nelson DR, Nelson C, Nieminen K, Nilsson O, Pereda V, Peter G, Philippe R, Pilate G,**  
774 **Poliakov A, Razumovskaya J, Richardson P, Rinaldi C, Ritland K, Rouzé P, Ryabov D, Schmutz J,**  
775 **Schrader J, Segerman B, Shin H, Siddiqui A, Sterky F, Terry A, Tsai C-J, Uberbacher E, Unneberg**  
776 **P, Vahala J, Wall K, Wessler S, Yang G, Yin T, Douglas C, Marra M, Sandberg G, Van de Peer Y,**  
777 **Rokhsar D** (2006) The genome of black cottonwood, *Populus trichocarpa* (Torr. & Gray). *Science*  
778 **313**: 1596-1604



779 **Vickers CE, Schenk PM, Li D, Mullineaux PM, Gresshoff PM** (2007) pGFPGUSPlus, a new binary vector  
780 for gene expression studies and optimising transformation systems in plants. *Biotechnol. Lett.*  
781 **29**: 1793-1796

782 **Villalobos Solis MI, Giannone RJ, Hettich RL, Abraham PE** (2019) Exploiting the dynamic relationship  
783 between peptide separation quality and peptide coisolation in a multiple-peptide matches-per-  
784 spectrum approach offers a strategy to optimize bottom-up proteomics throughput and depth.  
785 *Anal. Chem.* **91**: 7273-7279

786 **Wang D, Li Y, Li M, Yang W, Ma X, Zhang L, Wang Y, Feng Y, Zhang Y, Zhou R, Sanderson BJ, Keefover-**  
787 **Ring K, Yin T, Smart LB, DiFazio SP, Liu J, Olson M, Ma T** (2022) Repeated turnovers keep sex  
788 chromosomes young in willows. *Genome Biol.* **23**: 200

789 **Wilkerson DG, Taskiran B, Carlson CH, Smart LB** (2022) Mapping the sex determination region in the  
790 *Salix* F<sub>1</sub> hybrid common parent population confirms a ZW system in six diverse species. *G3-*  
791 *Genes Genom. Genet.* **12**: jkac071

792 **Wu T, Hu E, Xu S, Chen M, Guo P, Dai Z, Feng T, Zhou L, Tang W, Zhan L** (2021) clusterProfiler 4.0: A  
793 universal enrichment tool for interpreting omics data. *Innovation* **2**: 100141

794 **Yang S-L, Xie L-F, Mao H-Z, Puah CS, Yang W-C, Jiang L, Sundaresan V, Ye D** (2003) *Tapetum*  
795 *determinant1* is required for cell specialization in the Arabidopsis anther. *The Plant Cell* **15**:  
796 2792-2804

797 **Zhang MJ, Zhao TY, Ouyang XK, Zhao X-Y, Dai X, Gao X-Q** (2022) Pollen-specific gene *SKU5-SIMILAR 13*  
798 enhances growth of pollen tubes in the transmitting tract in Arabidopsis. *J. Exp. Bot.* **73**: 696-710

799 **Zhang S, Fernando DD** (2005) Structural, histochemical, and protein analysis of male reproductive  
800 development in willow. *Sex. Plant Reprod.* **18**: 37-46

801 **Zhang X, Henriques R, Lin S-S, Niu Q-W, Chua N-H** (2006) *Agrobacterium*-mediated transformation of  
802 *Arabidopsis thaliana* using the floral dip method. *Nat. Protoc.* **1**: 641-646

803 **Zhou R, Macaya-Sanz D, Carlson CH, Schmutz J, Jenkins JW, Kudrna D, Sharma A, Sandor L, Shu S, Barry**  
804 **K, Tuskan GA, Ma T, Liu J, Olson M, Smart LB, DiFazio SP** (2020) A willow sex chromosome  
805 reveals convergent evolution of complex palindromic repeats. *Genome Biol.* **21**: 38

806 **Zhou R, Macaya-Sanz D, Rodgers-Melnick E, Carlson CH, Gouker FE, Evans LM, Schmutz J, Jenkins JW,**  
807 **Yan J, Tuskan GA, Smart LB, DiFazio SP** (2018) Characterization of a large sex determination  
808 region in *Salix purpurea* L. (Salicaceae). *Mol. Genet. Genom.* **293**: 1437-1452

809

810

### Arabidopsis 100 vs GUS samples

*EnhancedVolcano*

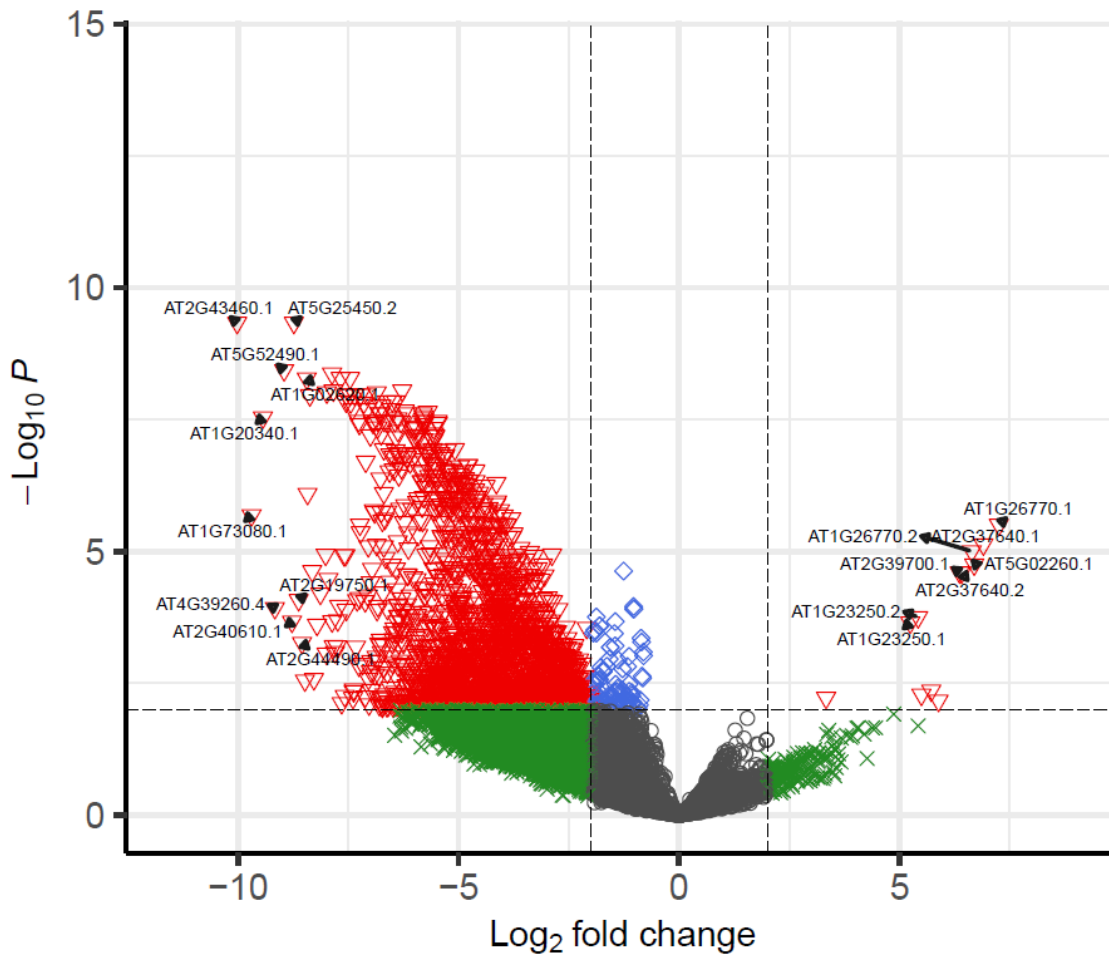

total = 16684 variables

### Arabidopsis 101 vs GUS samples

*EnhancedVolcano*

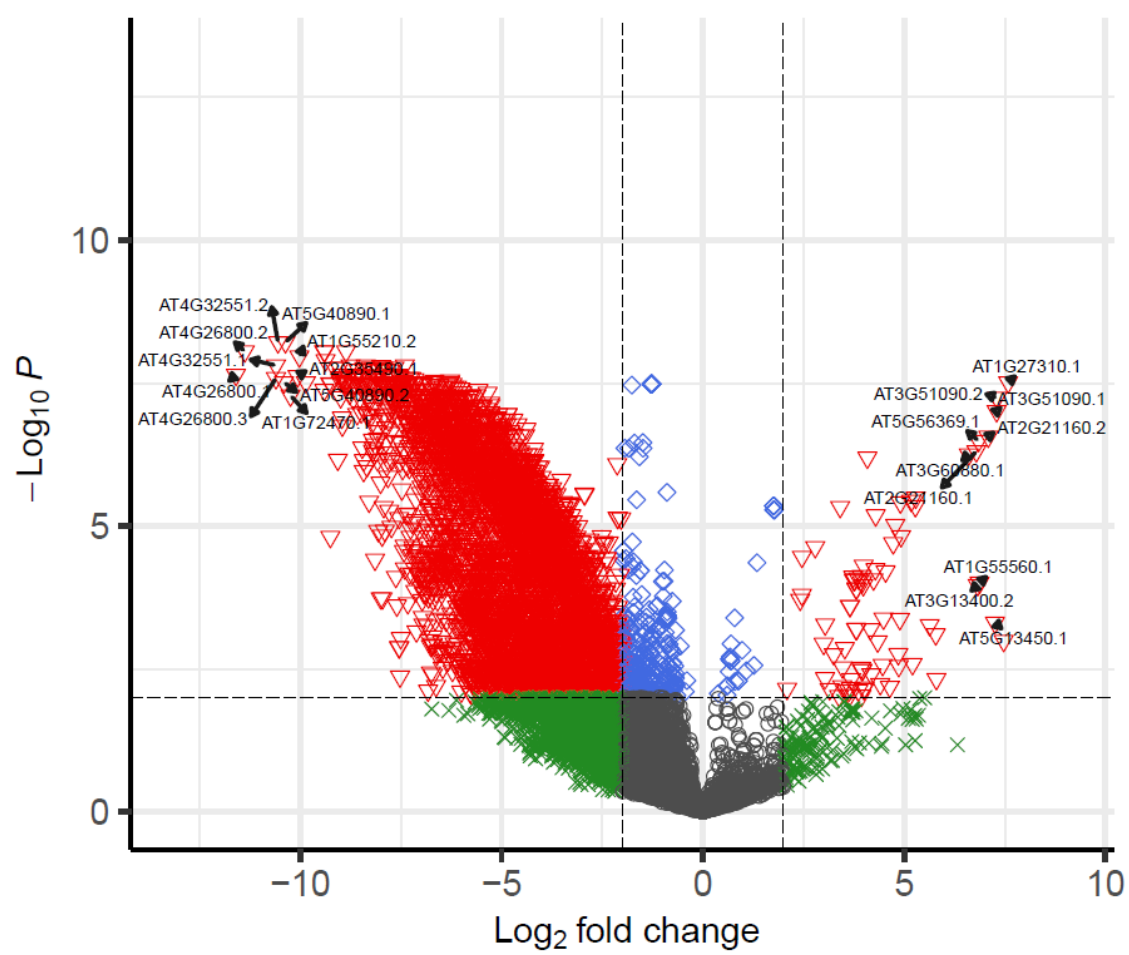

total = 16609 variables

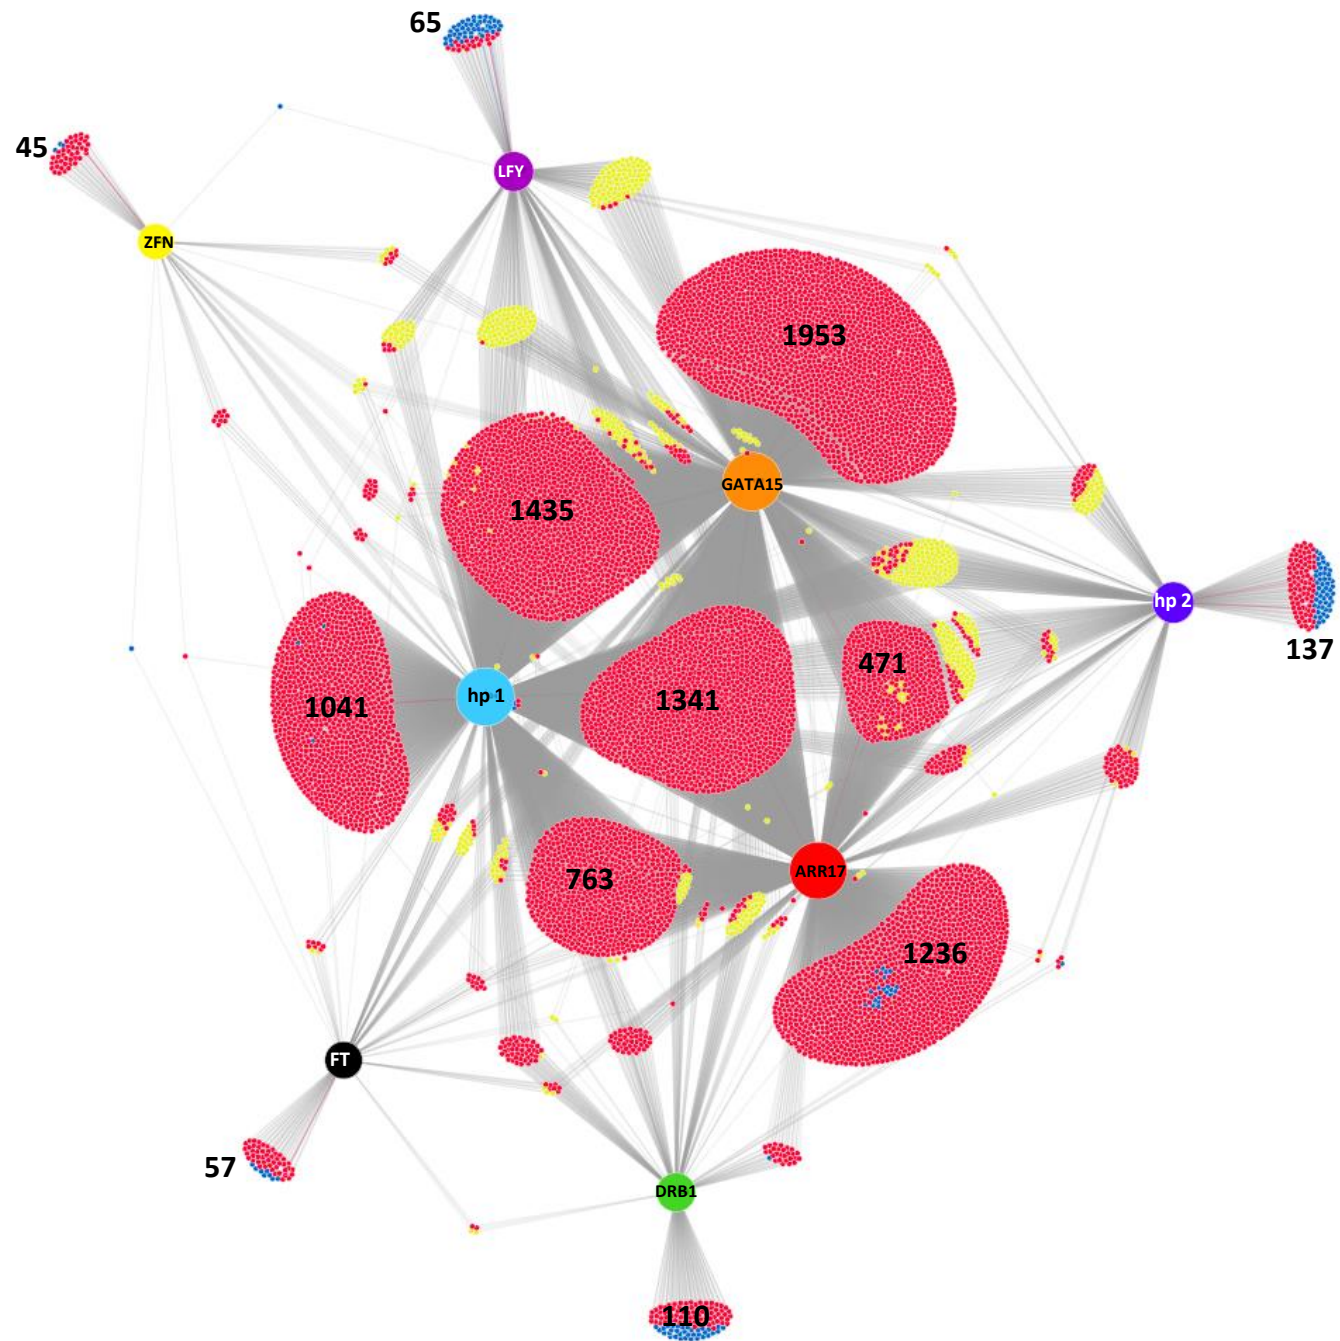

## Male

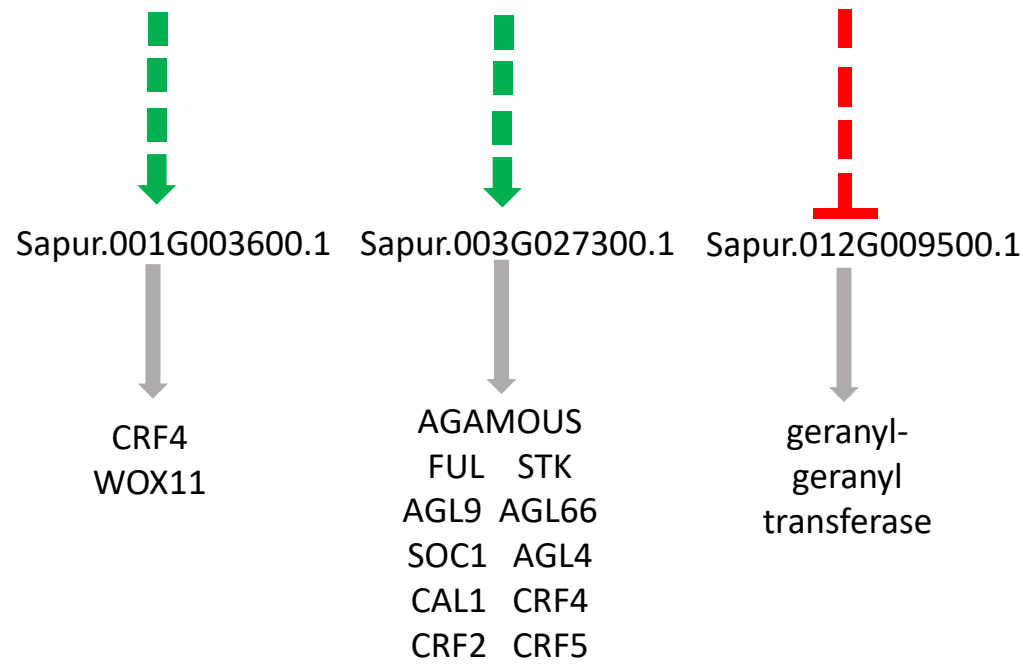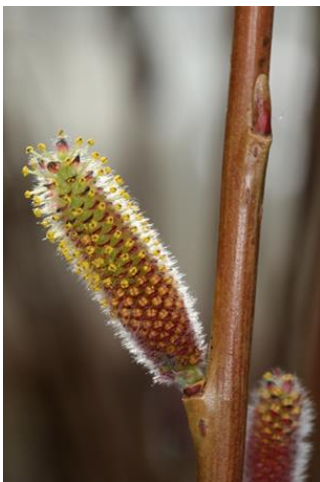

## Female

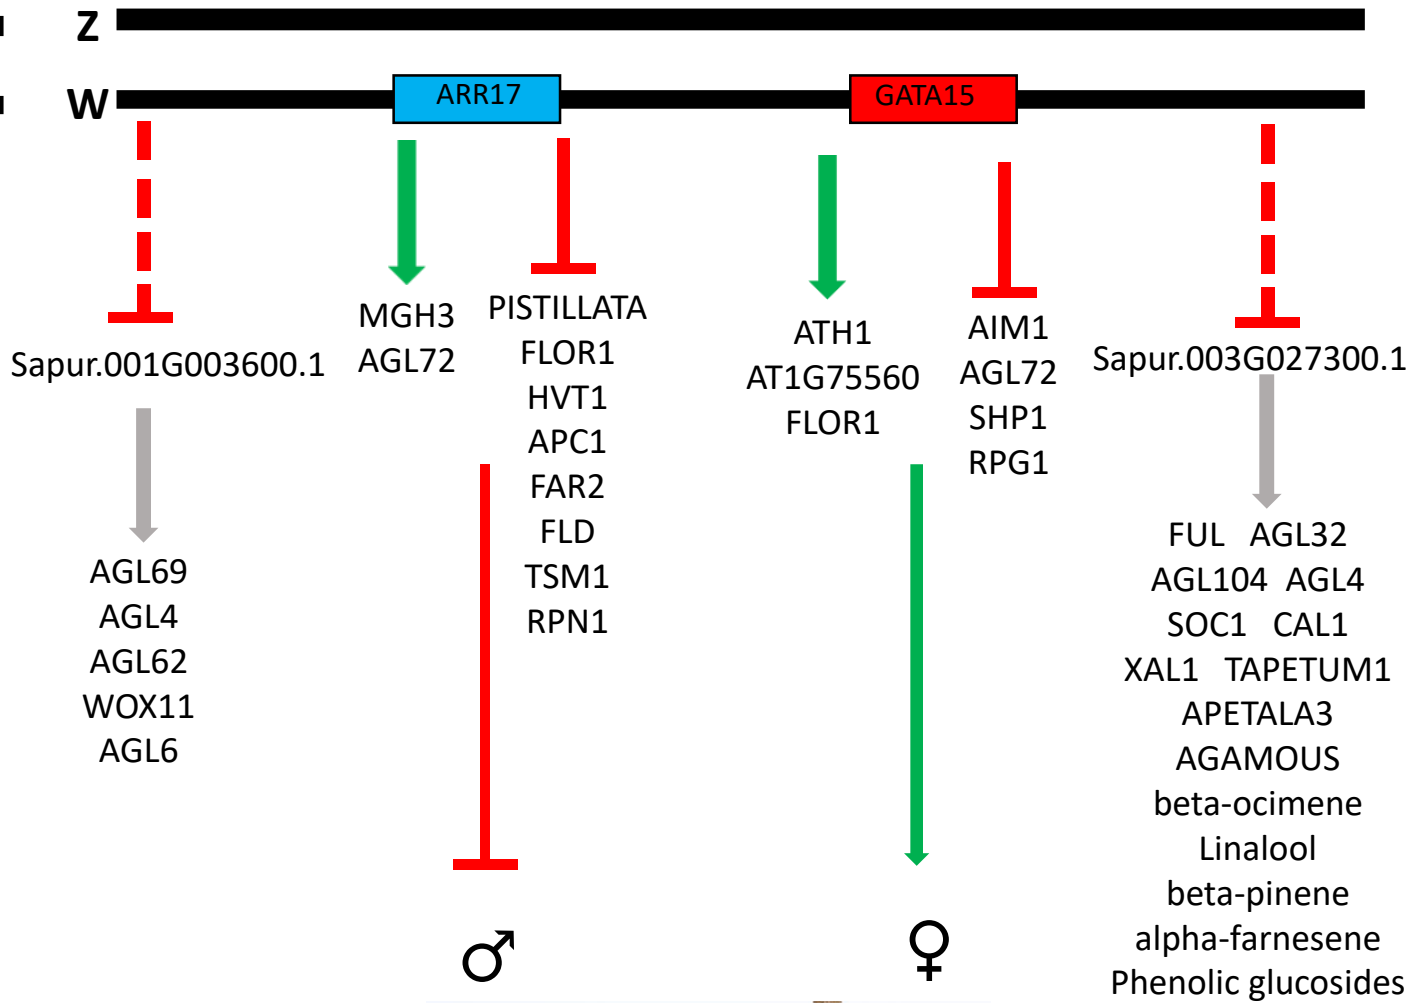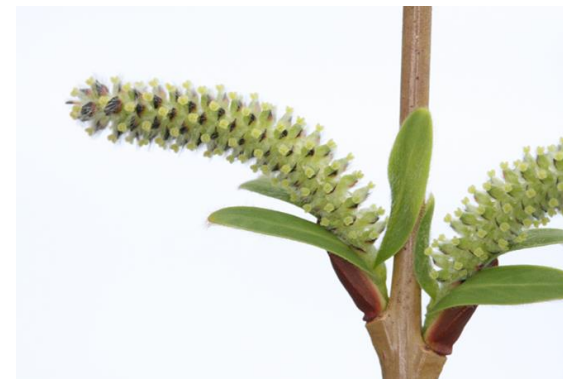

## Parsed Citations

**Acevedo FG, Gamboa A, Paéz-Valencia J, Jiménez-García LF, Izaguirre-Sierra M, Alvarez-Buylla ER (2004) FLOR1, a putative interaction partner of the floral homeotic protein AGAMOUS, is a plant-specific intracellular LRR. Plant Sci. 167: 225-231**

Google Scholar: [Author Only](#) [Title Only](#) [Author and Title](#)

**Akagi T, Pilkington SM, Varkonyi-Gasic E, Henry IM, Sugano SS, Sonoda M, Firl A, McNeilage MA, Douglas MJ, Wang T, Rebstock R, Voogd C, Datson P, Allan AC, Beppu K, Kataoka I, Tao R (2019) Two Y-chromosome-encoded genes determine sex in kiwifruit. Nature Plants 5: 801-809**

Google Scholar: [Author Only](#) [Title Only](#) [Author and Title](#)

**Albert E, Kawai-Ool U, Ezhova T (2015) Studying the role of FASCIATA5 gene in the regulation of flower development in Arabidopsis thaliana. Russ. J. Dev. B. 46: 19-26**

Google Scholar: [Author Only](#) [Title Only](#) [Author and Title](#)

**Argus GW (1997) Infrageneric classification of Salix (Salicaceae) in the new world. Syst. Bot. Monog. 52: 1-121**

Google Scholar: [Author Only](#) [Title Only](#) [Author and Title](#)

**Bailey TL, Elkan C (1994) Fitting a mixture model by expectation maximization to discover motifs in bipolymers. UCSD Technical Report: CS94-351.**

Google Scholar: [Author Only](#) [Title Only](#) [Author and Title](#)

**Batth TS, Tollenaere MX, Rütther P, Gonzalez-Franquesa A, Prabhakar BS, Bekker-Jensen S, Deshmukh AS, Olsen JV (2019) Protein aggregation capture on microparticles enables multipurpose proteomics sample preparation. Mol. Cell Proteomics 18: 1027-1035**

Google Scholar: [Author Only](#) [Title Only](#) [Author and Title](#)

**Baumgart LA, Lee JE, Salamov A, Dilworth DJ, Na H, Mingay M, Blow MJ, Zhang Y, Yoshinaga Y, Daum CG (2021) Persistence and plasticity in bacterial gene regulation. Nat. Methods 18: 1499-1505**

Google Scholar: [Author Only](#) [Title Only](#) [Author and Title](#)

**Blighe K, Rana S, Lewis M (2018) EnhancedVolcano: Publication-ready volcano plots with enhanced colouring and labeling, Github.**

**Carlson CH, Choi Y, Chan AP, Serapiglia MJ, Town CD, Smart LB (2017) Dominance and sexual dimorphism pervade the Salix purpurea L. transcriptome. Genome Biol. Evol. 9: 2377-2394**

Google Scholar: [Author Only](#) [Title Only](#) [Author and Title](#)

**Charlesworth D (2002) Plant sex determination and sex chromosomes. Heredity 88: 94-101**

Google Scholar: [Author Only](#) [Title Only](#) [Author and Title](#)

**Cronk Q, Müller NA (2020) Default sex and single gene sex determination in dioecious plants. Front. Plant Sci. 11: 1162**

Google Scholar: [Author Only](#) [Title Only](#) [Author and Title](#)

**De Folter S, Shchennikova AV, Franken J, Busscher M, Baskar R, Grossniklaus U, Angenent GC, Immink RG (2006) A Bsister MADS-box gene involved in ovule and seed development in petunia and Arabidopsis. Plant J. 47: 934-946**

Google Scholar: [Author Only](#) [Title Only](#) [Author and Title](#)

**Dorca-Fornell C, Gregis V, Grandi V, Coupland G, Colombo L, Kater MM (2011) The Arabidopsis SOC1-like genes AGL42, AGL71 and AGL72 promote flowering in the shoot apical and axillary meristems. Plant J. 67: 1006-1017**

Google Scholar: [Author Only](#) [Title Only](#) [Author and Title](#)

**Eng JK, McCormack AL, Yates JR (1994) An approach to correlate tandem mass spectral data of peptides with amino acid sequences in a protein database. J. Am. Soc. Mass Spectrom. 5: 976-989**

Google Scholar: [Author Only](#) [Title Only](#) [Author and Title](#)

**Gómez-Mena C, de Folter S, Costa MMR, Angenent GC, Sablowski R (2005) Transcriptional program controlled by the floral homeotic gene AGAMOUS during early organogenesis. Development 132: 429-438**

Google Scholar: [Author Only](#) [Title Only](#) [Author and Title](#)

**Goodstein DM, Shu S, Howson R, Neupane R, Hayes RD, Fazo J, Mitros T, Dirks W, Hellsten U, Putnam N, Rokhsar DS (2011) Phytozome: a comparative platform for green plant genomics. Nucleic Acids Res. 40: D1178-D1186**

Google Scholar: [Author Only](#) [Title Only](#) [Author and Title](#)

**Harkess A, Huang K, van der Hulst R, Tissen B, Caplan JL, Koppula A, Batish M, Meyers BC, Leebens-Mack J (2020) Sex determination by two Y-Linked genes in garden asparagus. Plant Cell 32: 1790-1796**

Google Scholar: [Author Only](#) [Title Only](#) [Author and Title](#)

**Hu L, Zheng T, Cai M, Pan H, Wang J, Zhang Q (2019) Transcriptome analysis during floral organ development provides insights into stamen petaloidy in Lagerstroemia speciosa. Plant Physiol. Biochem. 142: 510-518**

- Google Scholar: [Author Only](#) [Title Only](#) [Author and Title](#)
- Hyden B, Carlson CH, Gouker FE, Schmutz J, Barry K, Lipzen A, Sharma A, Sandor L, Tuskan GA, Feng G, Olson MS, DiFazio SP, Smart LB (2021) Integrative genomics reveals paths to sex dimorphism in *Salix purpurea* L. Hort. Res. 8: 170**  
Google Scholar: [Author Only](#) [Title Only](#) [Author and Title](#)
- Hyden B, Zou J, Wilkerson DG, Carlson CH, Rivera Robles A, DiFazio SP, Smart LB (2023) Structural variation of a sex-linked region confers monoecy and implicates GATA15 as a master regulator of sex in *Salix purpurea*. New Phytol. DOI 10.1111/nph.18853**  
Google Scholar: [Author Only](#) [Title Only](#) [Author and Title](#)
- Jing D, Chen W, Hu R, Zhang Y, Xia Y, Wang S, He Q, Guo Q, Liang G (2020) An integrative analysis of transcriptome, proteome and hormones reveals key differentially expressed genes and metabolic pathways involved in flower development in loquat. Int. J. of Mol. Sci. 21: 5107**  
Google Scholar: [Author Only](#) [Title Only](#) [Author and Title](#)
- Käfer J, Marais GAB, Pannell JR (2017) On the rarity of dioecy in flowering plants. Mol. Ecol. 26: 1225-1241**  
Google Scholar: [Author Only](#) [Title Only](#) [Author and Title](#)
- Käll L, Canterbury JD, Weston J, Noble WS, MacCoss MJ (2007) Semi-supervised learning for peptide identification from shotgun proteomics datasets. Nat. Methods 4: 923-925**  
Google Scholar: [Author Only](#) [Title Only](#) [Author and Title](#)
- Kardailsky I, Shukla VK, Ahn JH, Dagenais N, Christensen SK, Nguyen JT, Chory J, Harrison MJ, Weigel D (1999) Activation tagging of the floral inducer FT. Science 286: 1962-1965**  
Google Scholar: [Author Only](#) [Title Only](#) [Author and Title](#)
- Keefover-Ring K, Carlson CH, Hyden B, Azeem M, Smart LB (2022) Genetic mapping of sexually dimorphic volatile and non-volatile floral secondary chemistry of a dioecious willow. J. Exp. Bot. 73: 6352-6366**  
Google Scholar: [Author Only](#) [Title Only](#) [Author and Title](#)
- Krizek BA, Meyerowitz EM (1996) The Arabidopsis homeotic genes APETALA3 and PISTILLATA are sufficient to provide the B class organ identity function. Development 122: 11-22**  
Google Scholar: [Author Only](#) [Title Only](#) [Author and Title](#)
- Kuzovkina YA, Weih M, Romero MA, Charles J, Hust S, Mclvor I, Karp A, Trybush S, Labrecque M, Teodorescu TI (2007) Salix: botany and global horticulture. Hortic. Rev. 34: 447-489**  
Google Scholar: [Author Only](#) [Title Only](#) [Author and Title](#)
- Lamesch P, Berardini TZ, Li D, Swarbreck D, Wilks C, Sasidharan R, Muller R, Dreher K, Alexander DL, Garcia-Hernandez M (2012) The Arabidopsis Information Resource (TAIR): improved gene annotation and new tools. Nucleic Acids Res. 40: D1202-D1210**  
Google Scholar: [Author Only](#) [Title Only](#) [Author and Title](#)
- Larsson A (2014) AliView: a fast and lightweight alignment viewer and editor for large datasets. Bioinformatics 30: 3276-3278**  
Google Scholar: [Author Only](#) [Title Only](#) [Author and Title](#)
- Liljegren SJ, Ditta GS, Eshed Y, Savidge B, Bowman JL, Yanofsky MF (2000) SHATTERPROOF MADS-box genes control seed dispersal in Arabidopsis. Nature 404: 766-770**  
Google Scholar: [Author Only](#) [Title Only](#) [Author and Title](#)
- Liu W, Xu L, Lin H, Cao J (2021) Two expansin genes, AtEXPA4 and AtEXPB5, are redundantly required for pollen tube growth and AtEXPA4 is involved in primary root elongation in Arabidopsis thaliana. Genes 12: 249**  
Google Scholar: [Author Only](#) [Title Only](#) [Author and Title](#)
- Liu Z, Meyerowitz EM (1995) LEUNIG regulates AGAMOUS expression in Arabidopsis flowers. Development 121: 975-991**  
Google Scholar: [Author Only](#) [Title Only](#) [Author and Title](#)
- Lu J, Fu Y, Li M, Wang S, Wang J, Yang Q, Ye J, Zhang X, Ma H, Chang F (2020) Global quantitative proteomics studies revealed tissue-preferential expression and phosphorylation of regulatory proteins in Arabidopsis. Int. J. Mol. Sci. 21: 6116**  
Google Scholar: [Author Only](#) [Title Only](#) [Author and Title](#)
- Mizukami Y, Ma H (1992) Ectopic expression of the floral homeotic gene AGAMOUS in transgenic Arabidopsis plants alters floral organ identity. Cell 71: 119-131**  
Google Scholar: [Author Only](#) [Title Only](#) [Author and Title](#)
- Muller NA, Kersten B, Leite Montalvao AP, Mahler N, Bernhardsson C, Brautigam K, Carracedo Lorenzo Z, Hoenicka H, Kumar V, Mader M, Pakull B, Robinson KM, Sabatti M, Vettori C, Ingvarsson PK, Cronk Q, Street NR, Fladung M (2020) A single gene underlies the dynamic evolution of poplar sex determination. Nat. Plants 6: 630-637**  
Google Scholar: [Author Only](#) [Title Only](#) [Author and Title](#)

O'Malley RC, Huang SC, Song L, Lewsey MG, Bartlett A, Nery JR, Galli M, Gallavotti A, Ecker JR (2016) Cistrome and episcistrome features shape the regulatory DNA landscape. *Cell* 165: 1280-1292

Google Scholar: [Author Only](#) [Title Only](#) [Author and Title](#)

Orsburn BC (2021) Proteome Discoverer-A community enhanced data processing suite for protein informatics. *Proteomes* 9: 15

Google Scholar: [Author Only](#) [Title Only](#) [Author and Title](#)

Pucholt P, Ronnberg-Wastljung AC, Berlin S (2015) Single locus sex determination and female heterogamy in the basket willow (*Salix viminalis* L.). *Heredity* 114: 575-583

Google Scholar: [Author Only](#) [Title Only](#) [Author and Title](#)

Ranftl QL, Bastakis E, Klermund C, Schwechheimer C (2016) LLM-domain containing B-GATA factors control different aspects of cytokinin-regulated development in *Arabidopsis thaliana*. *Plant Physiol.* 170: 2295-2311

Google Scholar: [Author Only](#) [Title Only](#) [Author and Title](#)

Ritchie ME, Phipson B, Wu D, Hu Y, Law CW, Shi W, Smyth GK (2015) limma powers differential expression analyses for RNA-sequencing and microarray studies. *Nucleic Acids Res.* 43: e47-e47

Google Scholar: [Author Only](#) [Title Only](#) [Author and Title](#)

Rounsley SD, Ditta GS, Yanofsky MF (1995) Diverse roles for MADS box genes in *Arabidopsis* development. *The Plant Cell* 7: 1259-1269

Google Scholar: [Author Only](#) [Title Only](#) [Author and Title](#)

Sanderson BJ, Feng G, Hu N, Carlson CH, Smart LB, Keefover-Ring K, Yin T, Ma T, Liu J, DiFazio SP (2021) Sex determination through X-Y heterogamy in *Salix nigra*. *Heredity* 126: 630-639

Google Scholar: [Author Only](#) [Title Only](#) [Author and Title](#)

Schwacke R, Ponce-Soto GY, Krause K, Bolger AM, Arsova B, Hallab A, Gruden K, Stitt M, Bolger ME, Usadel B (2019) MapMan4: a refined protein classification and annotation framework applicable to multi-omics data analysis. *Mol. Plant* 12: 879-892

Google Scholar: [Author Only](#) [Title Only](#) [Author and Title](#)

Tuskan GA, DiFazio S, Jansson S, Bohlmann J, Grigoriev I, Hellsten U, Putnam N, Ralph S, Rombauts S, Salamov A, Schein J, Sterck L, Aerts A, Bhaleerao RR, Bhaleerao RP, Blaudez D, Boerjan W, Brun A, Brunner A, Busov V, Campbell M, Carlson J, Chalot M, Chapman J, Chen G-L, Cooper D, Coutinho PM, Couturier J, Covert S, Cronk Q, Cunningham R, Davis J, Degroev S, Déjardin A, dePamphilis C, Detter J, Dirks B, Dubchak I, Duplessis S, Ehling J, Ellis B, Gendler K, Goodstein D, Gribskov M, Grimwood J, Groover A, Gunter L, Hamberger B, Heinze B, Helariutta Y, Henrissat B, Holligan D, Holt R, Huang W, Islam-Faridi N, Jones S, Jones-Rhoades M, Jorgensen R, Joshi C, Kangasjärvi J, Karlsson J, Kelleher C, Kirkpatrick R, Kirst M, Kohler A, Kalluri U, Larimer F, Leebens-Mack J, Leplé J-C, Locascio P, Lou Y, Lucas S, Martin F, Montanini B, Napoli C, Nelson DR, Nelson C, Nieminen K, Nilsson O, Pereda V, Peter G, Philippe R, Pilate G, Poliakov A, Razumovskaya J, Richardson P, Rinaldi C, Ritland K, Rouzé P, Ryaboy D, Schmutz J, Schrader J, Segerman B, Shin H, Siddiqui A, Sterky F, Terry A, Tsai C-J, Uberbacher E, Unneberg P, Vahala J, Wall K, Wessler S, Yang G, Yin T, Douglas C, Marra M, Sandberg G, Van de Peer Y, Rokhsar D (2006) The genome of black cottonwood, *Populus trichocarpa* (Torr. & Gray). *Science* 313: 1596-1604

Google Scholar: [Author Only](#) [Title Only](#) [Author and Title](#)

Vickers CE, Schenk PM, Li D, Mullineaux PM, Gresshoff PM (2007) pGFPGUSPlus, a new binary vector for gene expression studies and optimising transformation systems in plants. *Biotechnol. Lett.* 29: 1793-1796

Google Scholar: [Author Only](#) [Title Only](#) [Author and Title](#)

Villalobos Solis MI, Giannone RJ, Hettich RL, Abraham PE (2019) Exploiting the dynamic relationship between peptide separation quality and peptide coisolation in a multiple-peptide matches-per-spectrum approach offers a strategy to optimize bottom-up proteomics throughput and depth. *Anal. Chem.* 91: 7273-7279

Google Scholar: [Author Only](#) [Title Only](#) [Author and Title](#)

Wang D, Li Y, Li M, Yang W, Ma X, Zhang L, Wang Y, Feng Y, Zhang Y, Zhou R, Sanderson BJ, Keefover-Ring K, Yin T, Smart LB, DiFazio SP, Liu J, Olson M, Ma T (2022) Repeated turnovers keep sex chromosomes young in willows. *Genome Biol.* 23: 200

Google Scholar: [Author Only](#) [Title Only](#) [Author and Title](#)

Wilkinson DG, Taskiran B, Carlson CH, Smart LB (2022) Mapping the sex determination region in the *Salix* F1 hybrid common parent population confirms a ZW system in six diverse species. *G3-Genes Genom. Genet.* 12: jkac071

Google Scholar: [Author Only](#) [Title Only](#) [Author and Title](#)

Wu T, Hu E, Xu S, Chen M, Guo P, Dai Z, Feng T, Zhou L, Tang W, Zhan L (2021) clusterProfiler 4.0: A universal enrichment tool for interpreting omics data. *Innovation* 2: 100141

Google Scholar: [Author Only](#) [Title Only](#) [Author and Title](#)

Yang S-L, Xie L-F, Mao H-Z, Puah CS, Yang W-C, Jiang L, Sundaresan V, Ye D (2003) Tapetum determinant1 is required for cell specialization in the *Arabidopsis* anther. *The Plant Cell* 15: 2792-2804

Google Scholar: [Author Only](#) [Title Only](#) [Author and Title](#)

Zhang MJ, Zhao TY, Ouyang XK, Zhao X-Y, Dai X, Gao X-Q (2022) Pollen-specific gene SKU5-SIMILAR 13 enhances growth of

**pollen tubes in the transmitting tract in *Arabidopsis*. J. Exp. Bot. 73: 696-710**

Google Scholar: [Author Only](#) [Title Only](#) [Author and Title](#)

**Zhang S, Fernando DD (2005) Structural, histochemical, and protein analysis of male reproductive development in willow. Sex. Plant Reprod. 18: 37-46**

Google Scholar: [Author Only](#) [Title Only](#) [Author and Title](#)

**Zhang X, Henriques R, Lin S-S, Niu Q-W, Chua N-H (2006) Agrobacterium-mediated transformation of *Arabidopsis thaliana* using the floral dip method. Nat. Protoc. 1: 641-646**

Google Scholar: [Author Only](#) [Title Only](#) [Author and Title](#)

**Zhou R, Macaya-Sanz D, Carlson CH, Schmutz J, Jenkins JW, Kudrna D, Sharma A, Sandor L, Shu S, Barry K, Tuskan GA, Ma T, Liu J, Olson M, Smart LB, DiFazio SP (2020) A willow sex chromosome reveals convergent evolution of complex palindromic repeats. Genome Biol. 21: 38**

Google Scholar: [Author Only](#) [Title Only](#) [Author and Title](#)

**Zhou R, Macaya-Sanz D, Rodgers-Melnick E, Carlson CH, Gouker FE, Evans LM, Schmutz J, Jenkins JW, Yan J, Tuskan GA, Smart LB, DiFazio SP (2018) Characterization of a large sex determination region in *Salix purpurea* L. (Salicaceae). Mol. Genet. Genom. 293: 1437-1452**

Google Scholar: [Author Only](#) [Title Only](#) [Author and Title](#)
